1 **Host-directed therapy with 2-Deoxy-D-glucose inhibits human rhinoviruses,**  
2 **endemic coronaviruses, and SARS-CoV-2**

3

4 Laxmikant Wali<sup>1,5</sup>, Michael Karbiener<sup>2,5</sup>, Scharon Chou<sup>1</sup>, Vitalii Kovtunyk<sup>1</sup>, Adam  
5 Adonyi<sup>1</sup>, Irene Gösler<sup>3</sup>, Ximena Contreras<sup>1</sup>, Delyana Stoeva<sup>1</sup>, Dieter Blaas<sup>3</sup>,  
6 Johannes Stöckl<sup>4</sup>, Thomas R. Kreil<sup>2</sup>, Guido A. Gualdoni<sup>1</sup> and Anna-Dorothea Gorki<sup>1,6</sup>

7

8 <sup>1</sup> G.ST Antivirals GmbH, Austria

9 <sup>2</sup> Global Pathogen Safety, Takeda Manufacturing Austria AG , Austria

10 <sup>3</sup> Center of Medical Biochemistry, Max Perutz Labs, Vienna Biocenter, Medical  
11 University of Vienna, Austria

12 <sup>4</sup> Institute of Immunology, Center of Pathophysiology, Immunology & Infectiology,  
13 Medical University of Vienna, Austria

14 <sup>5</sup> Contributed equally

15 <sup>6</sup> Corresponding author

16

17 Abstract word count: 132

18 Text word count: 3806

19 Figures: 4 main figures, 1 supplementary figure

20

21 Corresponding Author:

22 Anna-Dorothea Gorki, PhD,

23 G.ST Antivirals GmbH,

24 Doktor-Bohr-Gasse 7 (VBC6) 1030 Vienna, Austria

25 Phone: +43 6641869461

26 E-mail: [anna-dorothea.gorki@gst-antivirals.com](mailto:anna-dorothea.gorki@gst-antivirals.com)

27 **KEYWORDS:** antiviral, broad-spectrum antiviral therapy, 2-DG, rhinovirus,  
28 coronavirus, SARS-CoV-2

29

### 30 **HIGHLIGHTS**

31

- 32 • 2-DG inhibits replication of minor- and major-group rhinoviruses in epithelial  
33 cells including human nasal epithelial cell.
- 34 • 2-DG disrupts rhinovirus infection cycle and reduces rhinovirus-mediated cell  
35 death *in vitro*.
- 36 • 2-DG treatment attenuates viral load of endemic coronaviruses *in vitro*.

37

### 38 **ABSTRACT**

39

40 Rhinoviruses (RVs) and coronaviruses (CoVs) upregulate host cell metabolic  
41 pathways such as glycolysis to meet their bioenergetic demands for rapid  
42 multiplication. Using the glycolysis inhibitor 2-deoxy-D-glucose (2-DG), we assessed  
43 the dose-dependent inhibition of viral replication of minor- and major-receptor group  
44 RVs in epithelial cells. 2-DG disrupted RV infection cycle by inhibiting template  
45 negative-strand as well as genomic positive-strand RNA synthesis, resulting in less  
46 progeny virus and RV-mediated cell death. Assessment of 2-DG's intracellular  
47 kinetics revealed that after a short-exposure to 2-DG, the active intermediate, 2-  
48 DG6P, is stored intracellularly for several hours. Finally, we confirmed the antiviral  
49 effect of 2-DG on pandemic SARS-CoV-2 and showed for the first time that 2-DG  
50 also reduces replication of endemic human coronaviruses (HCoVs). These results  
51 provide further evidence that 2-DG could be utilized as a broad-spectrum antiviral.

52

### 53 **INTRODUCTION**

54

55 Rhinoviruses (RVs) and endemic human coronaviruses (HCoVs) are the major cause  
56 of acute respiratory tract (RT) infections in humans [1], [2]. These are largely self-  
57 limiting in healthy adults, where they usually remain confined to the upper respiratory  
58 tract. However, as the viruses spread rapidly and circulate seasonally, they lead to  
59 high incidence rates on an annual basis. These can cause severe morbidity in

60 elderly, children, and immune-compromised patients [3]–[6]. Along with human  
61 suffering, these viral infections lead to high economic losses and healthcare costs [7],  
62 [8]. While global efforts are underway to develop an effective therapy, the current lack  
63 of FDA-approved antivirals has limited the treatment of RT infections to supportive  
64 and symptomatic care.

65

66 As *Picornaviridae*, RVs are non-enveloped and contain a positive-sense single-  
67 stranded RNA genome ((+)ssRNA) [9]. They are divided into three species, RV-A,  
68 RV-B and RV-C. RV-A and RV-B are further classified as minor- and major-group  
69 based on the cognate host cell receptors they use for cell entry [10]–[12].  
70 Coronaviruses (CoVs) are enveloped viruses, belong to the *Coronaviridae* family and  
71 also contain a (+)ssRNA genome [13]. They are classified into four major genera:  
72 alpha, beta, gamma, and delta, targeting a variety of host species. In humans, strains  
73 from the alpha [14]–[16] and beta genera [17] are known to induce common colds  
74 similar to the ones caused by RVs [18], [19]. However, three strains from the beta  
75 genus, including Severe Acute Respiratory Syndrome Coronavirus 2 (SARS-CoV-2)  
76 were found to be more pathogenic with high fatality rates [20].

77

78 Viruses are dependent on the host cell metabolism and host cell machinery to ensure  
79 their replication. RVs and CoVs in particular are known to hijack and reprogram the  
80 host cell metabolic pathways for rapid multiplication, causing an increase in  
81 bioenergetic demand [21], [22]. This leads to an elevated anabolic state, forcing the  
82 host cell to synthesize more lipids and nucleotides using glucose and glutamine as  
83 substrates [23]. In addition, there is an increased demand for energy in the form of  
84 adenosine triphosphate (ATP) for viral replication and assembly, which is  
85 predominantly provided by glycolysis [23]–[25]. As an essential metabolic pathway,  
86 this involves breakdown of hexoses like glucose into pyruvate for ATP production.  
87 This dependency of RVs and CoVs, and presumably other viruses on host glucose  
88 metabolism for replication presents a promising target for the development of  
89 effective antiviral therapies.

90

91 2-Deoxy-D-glucose (2-DG), a stable analogue of glucose, is taken up by cells via  
92 glucose transporters and subsequently phosphorylated to 2-deoxy-D-glucose-6-  
93 phosphate (2-DG6P) by hexokinase [26], [27]. Unlike in glucose metabolism, 2-DG6P

94 cannot be further metabolized by phosphoglucose isomerase [28]. This leads to  
95 intracellular accumulation of 2-DG6P and arrest of glycolysis at the initial stage,  
96 causing depletion of glucose derivatives and substrates crucial for viral replication  
97 [29]. Previously, it has been demonstrated that 2-DG affects viral replication by  
98 reverting virus-induced metabolic reprogramming of host cells [24], [25], [30], [31].

99

100 The present study explores the broad-spectrum antiviral activity of 2-DG. In this  
101 process, we investigated the antiviral activity of 2-DG against minor- and major-group  
102 RVs in epithelial cells including primary human nasal epithelial cells (HNECs), the  
103 main site of RV replication. In concurrent experiments, we characterized 2-DG's  
104 intracellular kinetics. Finally, to better understand the inhibitory activity of 2-DG on the  
105 RV infection cycle, we quantified the template (-)ssRNA as well as the genomic  
106 (+)ssRNA and analyzed 2-DG's effect on RV-mediated cell death. Finally, we  
107 assessed the antiviral activity of 2-DG against endemic HCoVs as well as the  
108 pandemic SARS-CoV-2 strain. In summary, our study provides further evidence that  
109 reverting virus-induced metabolic reprogramming by 2-DG treatment critically affects  
110 viral RNA replication and thus holds great potential in combating respiratory viral  
111 infections.

112

113 **METHODS**

114

115 Details including supplier and catalogue number of all materials used are listed in  
116 Supplement table 1.

117

118 **Cell culture.** Cells were seeded in either 24-well tissue culture plates or T25 flasks  
119 and incubated at 37 °C in media and densities (cells per well or cells per flask) for the  
120 given times as indicated below; human nasal epithelial cells (HNECs) in HNEC  
121 medium (Pneumacult-ex plus basal medium supplemented with 1x Pneumacult-ex  
122 plus supplement, 0.1 % Hydrocortisone stock solution and 1 %  
123 Penicillin/Streptomycin (100 Units/mL) at  $4.5 \times 10^4$  cells/well (72 h) and HeLa Ohio  
124 cells in HeLa Ohio medium (RPMI 1640 medium supplemented with 10 % fetal  
125 bovine serum (FBS), 1 % Penicillin/Streptomycin (100 Units/mL) and 2 mM L-  
126 glutamine) at  $2 \times 10^5$  cells/well (16-20 h). LLC-MK2 and MRC-5 cells were cultured in  
127 T25 cell culture flasks in LLC-MK2 medium (Eagle-MEM supplemented with 10 %  
128 FBS, 1x non-essential amino acids solution (NEAS), 100 mg/mL Gentamycin sulfate  
129 and 25 mM HEPES) and MRC-5 medium (Eagle-MEM supplemented with 10 % FBS,  
130 2 mM L-Glutamine, 1x NEAS, 1 mM sodium pyruvate, 100 mg/mL gentamycin  
131 sulfate, 0.15 % sodium bicarbonate) at densities of  $8 \times 10^5$  and  $9 \times 10^5$  cells/flask,  
132 respectively. Vero cells were cultivated in TC Vero medium (supplemented with 5 %  
133 FBS, 2 mM L-Glutamine, 1x NEAS, 100 mg/mL gentamycin sulfate, and 0.075 %  
134 sodium bicarbonate).

135

136 **Viral infection and 2-DG treatment.** HeLa Ohio cells and HNECs were infected for  
137 1 h at 37 °C or 34 °C with RV at 0.005 to 0.5 TCID<sub>50</sub>/cell and  $4.5 \times 10^4$  TCID<sub>50</sub>/well,  
138 followed by treatment with 2-DG for 6 h, 24 h or 48 h. The supernatant from the cells  
139 was then subjected to virus titer analysis or the cells were treated with cell lysis buffer  
140 for RNA extraction. LLC-MK2 cells and MRC-5 cells were infected with SARS-CoV-2  
141 (Beta-CoV/Germany/BavPat1/2020) (MOI of 0.001) at 36 °C and HCoV-229E (MOI of  
142 0.01) at 36 °C or HCoV-NL63 (MOI of 0.01) at 33 °C, respectively. Cells were treated  
143 with 2-DG 1 h post-infection and samples were collected at the indicated times for  
144 virus titer analysis.

145

146 **RNA isolation and cDNA synthesis.** Intra- and extra-cellular RNA was isolated  
147 according to the ExtractMe Total RNA Kit instructions. To avoid bias in extracellular  
148 RNA isolation, an internal spike-in RNA control was added to each sample. RNA  
149 concentration and purity was assessed using a nanophotometer. cDNA was  
150 synthesized according to the First strand cDNA synthesis kit using the program: 37  
151 °C for 60 min and 70 °C for 5 min. Measurement of viral negative-sense single-strand  
152 RNA ((-)ssRNA) was performed as previously described [32] except that the  
153 synthesized cDNA wasn't RNase treated and purified. The cDNA from (-)ssRNA was  
154 synthesized using a mix of strand-specific, chimeric sequence-containing primer  
155 chimHRV-b14\_RT and control primer HPRT\_R (Supplement table 1) instead of  
156 oligo(dT).

157

158 **qPCR.** qPCR was performed using SYBR green mix and primers as specified in  
159 Supplement table 1. For measuring intracellular viral RNA, gene expression was  
160 normalized to HPRT using the Livak method [33] and expressed as fold change to  
161 control (infected, but untreated). Primers HRV-B14\_R and chimHRV-b14\_R1 were  
162 used for measurement of viral (-)ssRNA. For extracellular viral RNA, synthetic oligo  
163 standard (HRV-B14\_F, HRV-B14\_R and HRV-B14 primer amplicon, Supplement  
164 table 1) was used to generate a standard curve for the calculation of viral copy  
165 number by interpolation. Based on the qPCR data, the IC<sub>50</sub> was calculated using  
166 least square regression on Prism 9.0.2.

167

168 **Virus titration.** Samples from SARS-CoV-2, HCoV-229E and HCoV-NL63 were  
169 titrated on Vero cells, MRC-5 cells, and LLC-MK2 cells, respectively. Samples from  
170 RV-B14 were titrated on HeLa Ohio cells. Titration was performed using eightfold  
171 replicates of serial half-log<sub>10</sub> (for SARS-CoV-2, HCoV-229E and HCoV-NL63) or log<sub>10</sub>  
172 (for RV-B14) dilutions of virus-containing samples followed by incubation at 36 °C  
173 (SARS-CoV-2, HCoV-229E), 33 °C (HCoV-NL63) and 34 °C (RV-B14) for 5-7 days  
174 (SARS-CoV-2, HCoV-229E, RV-B14) or 9-11 days (HCoV-NL63). Wells were  
175 inspected under a microscope for cytopathic effect (CPE). For RV-B14, CPE was  
176 visualized by crystal violet staining. Recognizable CPE at each tested dilution was  
177 used to determine the dose according to Reed and Muench [34] and reported as  
178 log<sub>10</sub>-transformed median tissue culture infectious dose per milliliter  
179 (log<sub>10</sub>[TCID<sub>50</sub>/mL]).

180

181 **Virus-induced cytopathic effect.** HeLa Ohio cells were infected for 1 h at 37 °C  
182 with RV-B14 (0.5 TCID<sub>50</sub>/cell) followed by 2-DG treatment for 24 h or 48 h at 37 °C.  
183 CPE was visualized by crystal violet staining. The effect of 2-DG on virus-induced cell  
184 death was assessed by calculating the ratio of the average of treated, uninfected to  
185 each treated, infected sample value.

186

187 **Cell viability.** HNECs were treated with 2-DG for 7 h at 37 °C. Cell viability was  
188 assessed by crystal violet staining. The effect of 2-DG on cell viability was calculated  
189 relative to untreated cells.

190

191 **Crystal violet staining.** Cells were incubated with crystal violet solution (0.05 %  
192 crystal violet in 20 % methanol) for 30-60 min, washed with ddH<sub>2</sub>O, air-dried, followed  
193 by 25 % glacial acetic acid. The absorbance was recorded at 450 nm.

194

195 **Glucose-uptake assay.** Cells were treated with 2-DG in the absence of glucose for  
196 10 min at 37 °C, followed by washing with PBS and incubation for up to 270 min in  
197 glucose-free medium. 2-DG uptake was assessed using the Glucose-Uptake Glo™  
198 Assay kit. Luminescence was recorded on a microplate reader. 2-DG6P levels were  
199 calculated as percentage of signal upon exposure to 2-DG after subtracting the  
200 background value obtained from control samples (not treated with 2-DG).

201

202 **Statistical analysis.** The graphs show pooled results of independent experiments  
203 with each experiment containing two to four cell culture wells per condition with the  
204 standard error of the mean (SEM). Analysis of statistical significance was performed  
205 using Student's *t*-test (unpaired analysis) or ordinary one-way ANOVA with Dunnett's  
206 correction or 2-way ANOVA with Bonferroni's correction and considered significant  
207 when  $p < 0.05$  (\* $p \leq 0.05$ , \*\* $p \leq 0.01$ , \*\*\* $p \leq 0.001$ , \*\*\*\* $p \leq 0.0001$ ).

208 **RESULTS**

209

210 **2-DG inhibits RV replication in HeLa Ohio cells and HNECs**

211

212 2-Deoxyglucose (2-DG) treatment has been shown to inhibit rhinovirus (RV) infection  
213 by reverting RV-induced anabolic reprogramming of host cell metabolism [25]. While  
214 the effect of 2-DG on RV-B14 [25] and RV-C15 [35] was shown before, its effect on  
215 additional serotypes belonging to minor- and major-group RVs [10]–[12] remains to  
216 be investigated. For this, HeLa Ohio cells were infected with minor-group (RV-A1B,  
217 RV-A2) and major-group (RV-A89, RV-A16, RV-A54) RVs. 2-DG treatment led to a  
218 dose-dependent reduction in intracellular viral RNA levels of all major- and minor-  
219 group RVs tested (Supplement Figure 1). As 2-DG is transported into cells utilizing  
220 the same transporters as glucose, this results in a competition for the uptake of 2-DG  
221 [26], [27]. The glucose concentration in conventional cell culture media ranges from 2  
222 g/L to 4.5 g/L and is much higher compared to *in vivo* glucose levels (e.g., in the  
223 blood it ranges from 3.9 to 5.6 mmol/L i.e., 0.7 to 1 g/L). Therefore, we tested the  
224 antiviral effect of 2-DG under physiological glucose levels (Figure 1). We reduced the  
225 glucose concentration in the cell culture medium to 1 g/L to mimic a setting  
226 corresponding to human plasma. 2-DG treatment at physiological glucose levels  
227 showed an even stronger inhibitory effect on intracellular viral RNA levels of all  
228 major- and minor-group RVs (Figure 1A). With the highest tested concentration of 2-  
229 DG (30 mM) we observed a complete abolishment of viral RNA replication (Figure  
230 1A). In line with these results, the absolute half-maximal inhibitory concentration  
231 ( $IC_{50}$ ) of 2-DG was lower under the physiological glucose setting: The  $IC_{50}$  ranged  
232 from 1.92 mM to 2.67 mM as compared to 3.44 mM to 9.22 mM for cells infected and  
233 treated under conventional culture conditions (Figure 1B, Supplement table 2).

234 Further, we evaluated the effect of 2-DG on RV-B14 and RV-A16 replication in  
235 human nasal epithelial cells (HNECs), the natural replication site for RVs. In line with  
236 the previous findings, 10 mM and 30 mM 2-DG treatment strongly inhibited RV-B14  
237 and RV-A16 replication (Figure 1C). To be noted, unlike in HeLa Ohio cell culture  
238 medium, where the glucose level is known, glucose levels in HNECs culture medium  
239 (STEMCELL Technologies) are not disclosed.

240 As 2-DG inhibits glycolysis, a major energy generating pathway, we assessed  
241 whether it has an impact on cell viability in our setting. We did not measure a



242 significant reduction in cell viability after 7 h 2-DG treatment (Figure 1D). Taken  
243 together, the data suggests that 2-DG inhibits RV replication in a dose-dependent  
244 manner, independent of the RV strain and cell type used. No toxic effects on the cells  
245 were recorded at concentrations those employed in the virus inhibition experiments.  
246 Furthermore, we observed better uptake and enhanced antiviral activity of 2-DG at  
247 physiological glucose levels.

248

### 249 **A short exposure to 2-DG leads to extended intracellular storage of 2-DG6P**

250

251 Once 2-DG is taken up by the cell, it is phosphorylated to 2-deoxy-D-glucose-6-  
252 phosphate (2-DG6P), which leads to the arrest of glycolysis and altering of viral  
253 replication [25]. Thus, the kinetics of cellular uptake and intracellular storage are  
254 crucial for the antiviral activity of 2-DG. Therefore, we investigated the intracellular  
255 concentration kinetics of 2-DG6P in HeLa Ohio cells and HNECs. The experimental  
256 setup was designed to mimic treatment setting of 2-DG *in vivo*, e.g., a local  
257 application to the nasal cavity. Cells were treated with 1 mM and 10 mM 2-DG for 10  
258 min, followed by washing to remove extracellular 2-DG and subsequent incubation up  
259 to 270 min and quantification of 2-DG6P levels (Figure 2A). At time zero (immediately  
260 after the 10 min 2-DG treatment), higher 2-DG6P levels were observed in 10 mM 2-  
261 DG treatment compared to 1 mM 2-DG treatment, in both HeLa Ohio cells and  
262 HNECs (Figure 2B, 2C, left graph). The intracellular 2-DG6P level measured at time  
263 zero was then set to 100 %, and the percentage decay of 2-DG6P over time was  
264 calculated. In HeLa Ohio cells 3.5 %  $\pm$  0.6 % (mean $\pm$ SEM) and 18.5 %  $\pm$  3.4 % 2-  
265 DG6P were measured in 1 mM and 10 mM 2-DG treated cells after 270 min (Figure  
266 2B). In the case of HNECs, higher levels of 2-DG6P retention were observed after  
267 270 min; 10.1 %  $\pm$  1.5 % and 42.6 %  $\pm$  7.2 % 2-DG6P being detected in cells pre-  
268 treated with 1 mM and 10 mM 2-DG (Figure 2C), respectively. Collectively, the data  
269 suggest that short exposure of the cells to 2-DG leads to an intracellular  
270 accumulation of the active intermediate 2-DG6P for several hours.

271

### 272 **2-DG disrupts RNA template strand synthesis and inhibits RV-mediated cell** 273 **death**

274

275 In our initial investigation of 2-DG mediated inhibition of RV replication, we measured  
276 the (+)ssRNA copies because of its abundance (10,000-fold higher than (-)ssRNA)  
277 [36] and the ease of quantification. However, the RV replication cycle involves  
278 generation of (-)ssRNA which is used as template for the replication of positive strand  
279 genomes [37]. Thus, the determination of (-)ssRNA serves as a means to quantify  
280 double stranded RNA (dsRNA), which is an intermediate of viral replication [36], [38].  
281 Therefore, we analyzed the influence of 2-DG on synthesis of (-)ssRNA and of  
282 (+)ssRNA at 24 h post-infection. 10 mM 2-DG treatment led to a significant decrease  
283 in template (-)ssRNA levels of RV-B14 at 24 h post-infection (Figure 3A). This result  
284 was closely mirrored by decrease in the (+)ssRNA strand upon 2-DG treatment  
285 (Figure 3A). Simultaneously, we found that 2-DG treatment led to a significant  
286 decrease in the number of viral RNA copies in the supernatant (Figure 3B), implying  
287 an impairment of the amount of released virus. Next, we assessed 2-DG's impact on  
288 viral load by means of median tissue culture infectious dose (TCID<sub>50</sub>) assays. RV-  
289 B14 infected HeLa Ohio cells were treated with 2-DG at 3.57 mM, corresponding to  
290 IC<sub>90</sub>, up to 48 h and the supernatants containing progeny virus were collected every  
291 24 h and analyzed by virus infectivity assay. The above IC<sub>90</sub> concentration of 2-DG  
292 was calculated from the previously derived dose-response curve in HeLa Ohio cells  
293 (Figure 1A, RV-B14). In comparison to the untreated cells, 2-DG treated cells showed  
294 a significant reduction in viral load 48 h post-infection (Figure 3C).

295 A characteristic of RV infection of tissue culture cells is the cytopathic effect (CPE)  
296 [39]. The impact of increasing concentrations of 2-DG on RV-induced cell death was  
297 assessed in HeLa Ohio cells at 24 h and 48 h post-infection. A significant reduction in  
298 CPE was seen in cells treated with 2-DG at 0.33 mM and higher after 24 h (Figure  
299 3D). At 48 h post-infection, a stronger CPE could be observed in infected but  
300 untreated cells ('Virus only') and cell death was significantly reduced upon treatment  
301 with 2-DG at 0.33 mM or higher (Figure 3D). Together, these results suggest that 2-  
302 DG affects the RV life cycle by suppressing viral RNA replication and viral load and  
303 reduces RV-mediated cell death.

304

### 305 **2-DG decreases CoV viral load**

306

307 Similar to RVs, SARS-CoV-2 was recently shown to exploit the host glucose  
308 metabolism for replication and can potentially be targeted by 2-DG [24], [35].

309 However, 2-DG's effect on endemic HCoV's hasn't been investigated so far. With this  
310 rationale we investigated the effect of 2-DG on the viral load of the pandemic strain,  
311 SARS-CoV-2 as well as the two endemic human CoV stains, HCoV-229E and HCoV-  
312 NL63. Cells with known susceptibility to these coronaviruses were treated with  
313 increasing concentrations of 2-DG for 24 h to 48 h. The supernatant containing  
314 released virus was sampled every 24 h and viral load was assessed as TCID<sub>50</sub>. We  
315 observed a significant reduction in SARS-CoV-2 at 24 h post-infection at the highest  
316 tested 2-DG concentration (10 mM), and further, lower 2-DG concentrations led to  
317 significant effects 48h post-infection (Figure 4A). A similar behavior was observed for  
318 HCoV-229E, where 24 h and 48 h post-infection, a significant reduction in viral load  
319 was observed in cells treated with 0.32 mM and 1 mM 2-DG (Figure 4B). The use of  
320 lower 2-DG concentrations was based on decreased viability of MRC5 cells at 2-DG  
321 concentrations above 1 mM (data not shown). In the case of HCoV-NL63, there was  
322 no significant decrease in viral load at 24 h, however, at 48 h post-infection 2-DG  
323 concentrations above 1 mM suppressed viral load significantly (Figure 4C). These  
324 results suggest that 2-DG exerts a dose-dependent reduction in viral load of  
325 pandemic as well as endemic CoV strains.

326

327 **DISCUSSION**

328

329 In this study we investigated a host-directed approach to combat rhinovirus (RV) and  
330 coronavirus (CoV) infection by using 2-Deoxy-D-glucose (2-DG). This approach is  
331 based on the understanding that virus-induced metabolic reprogramming of the host  
332 cell plays a crucial role in viral replication [21], [22], [25]. Previously, Gualdoni et al.  
333 [25] demonstrated that 2-DG reverts RV-induced metabolic reprogramming of host  
334 cells and inhibits RV-B14 replication. Consequently, in the present study, we  
335 investigated the antiviral activity of 2-DG against additional minor- and major-group  
336 RVs, where 2-DG showed a dose-dependent inhibition of RV replication in epithelial  
337 cells including primary human nasal epithelial cells (HNECs). Simultaneously, we  
338 showed that treatment with 2-DG does not induce cytotoxic effects in this setting.  
339 Further, we sought to elucidate the implications of 2-DG on the RV replication cycle,  
340 intracellular kinetics of 2-DG and its impact on RV viral load. We found that 2-DG  
341 treatment led to a marked inhibition of template negative strand as well as genomic  
342 positive strand RNA replication. 2-DG treatment caused a significant reduction in the  
343 extracellular viral RNA level, RV viral load and in the RV-mediated cytopathic effect.  
344 At a physiological glucose concentration, 2-DG treatment led to enhanced inhibition  
345 of RV replication as compared to conventional high-glucose culture conditions.  
346 Assessment of 2-DG's intracellular kinetics showed accumulation of the active  
347 intermediate, 2-DG6P, for several hours. Our concurrent study of 2-DG's impact on  
348 CoVs also showed a significant reduction in viral load. Taken together, the results  
349 suggest 2-DG to be a potential broad-spectrum antiviral.

350

351 In our study, treatment with 2-DG inhibited replication of all tested minor- and major-  
352 receptor group strains of RV in HeLa Ohio cells under conventional culture condition  
353 (i.e., 2 g/L glucose) (Supplement Figure 1) and in primary human nasal epithelial  
354 cells (HNECs) (Figure 1C). As 2-DG competes with glucose for cellular uptake [26],  
355 [27], we lowered the glucose concentration to 1 g/L glucose – mimicking the human  
356 plasma glucose concentration – to assess the efficacy of 2-DG in a physiological  
357 context. We found that lower glucose concentrations potentiated 2-DG-mediated  
358 inhibition of RV replication, pointing to a higher efficacy of 2-DG in physiological  
359 settings (Figure 1A, Supplement table 2). It should be noted that the glucose  
360 concentration in fluid lining the nose and lung epithelium in humans is around 12.5

361 times lower than in plasma [40]. Therefore, it can be anticipated that 2-DG exhibits  
362 even higher antiviral efficacy in therapeutic target tissues. However, additional  
363 studies in models closer to the physiologic conditions are warranted to test this  
364 hypothesis. Further, as exposure to 2-DG has been shown to induce cytotoxic effects  
365 [41]–[43] we specifically tested the effect of 2-DG on HNECs and found no significant  
366 reduction in cell viability after 7 h 2-DG treatment (Figure 1D). Based on the  
367 experimental evidence and toxicology studies, the safety and pharmacokinetics of  
368 local (intranasal) 2-DG administration is currently being investigated in a Phase I  
369 clinical trial in Austria (NCT05314933) [44].

370

371 In the next step, we characterized the intracellular kinetics of 2-DG6P after a short  
372 exposure to 2-DG (Figure 2A). In the cell, 2-DG is phosphorylated to 2-DG6P,  
373 leading to its intracellular accumulation. Cytochalasin B, an inhibitor of the glucose  
374 transporter, was used as a control to ensure 2-DG6P specificity in our set-up (data  
375 not shown). Overall, we found that 2-DG6P was detectable up to several hours in  
376 HeLa Ohio cells and HNEC after a short incubation of the cells with 2-DG. The setup  
377 in this experiment mimics the *in vivo* setting where local treatment, e.g., in the nose,  
378 would only lead to a short exposure of epithelial cells to 2-DG. Our results suggest  
379 that even a brief exposure time is sufficient for extended inhibition of glycolysis via 2-  
380 DG6P and thereby to exhibit an antiviral effect.

381

382 During the RV replication cycle, the viral polyprotein is first generated via translation  
383 from the (+)ssRNA genome, which is then processed by viral proteases to generate  
384 viral proteins including the viral RNA polymerase [45]. Next, RNA polymerase  
385 generates (-)ssRNA strand copies, which in turn serve as a template for the multifold  
386 replication of the positive stand viral genome to be packaged in viral capsids, finally  
387 leading to release of the mature virions [46]. As conventional qPCR holds limitations  
388 to detect the negative strand in excess of positive strand copies, we employed a  
389 recently published strategy by Wiehler and Proud [32] to analyze the negative strand  
390 level. We observed that 2-DG significantly reduced the template (-)ssRNA as well as  
391 the genomic (+)ssRNA, a likely cause for the measured significant reduction in  
392 detectable extracellular viral RNA (Figure 4A&B). These findings point at a 2-DG-  
393 mediated impairment in viral RNA replication, resulting in a reduced amount of  
394 released virus. In line with this, TCID<sub>50</sub> titration of the released virus on HeLa Ohio

395 cells showed a reduction in viral load (Figure 4C). To be noted, HeLa Ohio cells used  
396 in this experimental setup, due to their cancerous origin, have a high glucose  
397 demand and are especially sensitive to glucose starvation and 2-DG treatment.  
398 Therefore, low amounts of 2-DG were used, and the cells were treated only once  
399 after the start of the RV infection. This could explain the relatively small difference in  
400 viral load (Figure 3C) in contrast to the significant difference in released extracellular  
401 viral RNA (Figure 3B).

402 In our subsequent analysis, we found that 2-DG exerted a protective effect by  
403 significantly reducing virus-induced cell death in HeLa Ohio cells (Figure 4D). In  
404 contrast, RV infection does not cause cell lysis in cultures of healthy bronchial  
405 epithelial cells [47]. Interestingly, the same study reported increased viral replication  
406 and cell lysis after RV infection in asthmatic bronchial epithelial cells [47]. Based on  
407 these findings, we could envision protection of RV-infected bronchial epithelial cells  
408 of asthma patients by 2-DG.

409

410 The host metabolic dependency of CoVs is similar to that of RVs and studies suggest  
411 that 2-DG alters SARS-CoV-2 replication [24], [26], [48]. These results prompted us  
412 to further investigate the effect of 2-DG on CoVs infection. In our study, 2-DG  
413 treatment of pandemic SARS-CoV-2 resulted in a dose-dependent reduction of viral  
414 load. In line, 2-DG has been approved for use in patients with moderate to severe  
415 SARS-CoV-2 infection in India by Drug Controller General India (DCGI) after  
416 performance of Phase II and Phase III clinical trials conducted by the Defense  
417 Research and Development Organization (DRDO), India in collaboration with Dr  
418 Reddy's Laboratories, India [49]. However, the peer reviewed data of the trials are  
419 still unpublished. Further, in our study, we show for the first time the antiviral effect of  
420 2-DG on endemic HCoV-229E and NL63. As in the case of SARS-CoV-2, 2-DG  
421 caused a dose-dependent reduction in viral load in both endemic HCoV strains.

422 Comparing our data from RV viral load, lower concentrations of 2-DG are sufficient to  
423 cause a long-term significant reduction in viral load in both endemic and pandemic  
424 CoVs. The difference between RV and CoV with respect to the required 2-DG  
425 concentrations can be attributed to differences in cell culture models. Another  
426 possible explanation is that CoVs are enveloped [13] and contain glycosylated  
427 envelope proteins responsible for host cell interaction and infection. Along with CoVs  
428 dependence on host glucose metabolism for replication [24], they are also dependent

429 on the host cell machinery for glycosylation of viral proteins [50]. Thus, the reduction  
430 in CoV viral load could originate from 2-DG not only inhibiting glycolysis but also  
431 affecting protein and lipid glycosylation [51]. However, further studies are required to  
432 decipher a possible role of 2-DG in the production of defective virions in enveloped  
433 viruses.

434

435 In conclusion, we present further *in vitro* data that support a host-directed approach  
436 to tackle RV and CoV infections. The dependency of these viruses on the host cell  
437 metabolism and cell machinery reveals a therapeutic opportunity to target them with  
438 host-directed antivirals such as 2-DG. The low cytotoxicity of 2-DG and the long half-  
439 life of the active metabolite 2-DG6P advocates its short-time topic application at  
440 comparably high concentrations, e.g., as a spray to be employed early in infection,  
441 which might safely block viral spreading.

442 **ACKNOWLEDGMENTS**

443

444 We thank Melanie Graf and the Global Pathogen Safety Team (Takeda), most  
445 notably Jasmin de Silva, Elisabeth List and Effie Oindo (experiments), Veronika  
446 Sulzer (cell culture), Eva Ha, Simone Knotzer and Alexandra Schlapschy-Danzinger  
447 (virus propagation). SARS-CoV-2 was sourced via EVAg (supported by the European  
448 Community) and kindly provided by Christian Drosten and Victor Corman (Charité  
449 Universitätsmedizin, Institute of Virology, Berlin, Germany). HCoV-NL63 was kindly  
450 provided by Lia van der Hoek (Medical Microbiology, Academisch Medisch Centrum,  
451 Amsterdam, Netherlands).

452

453 **FUNDING**

454

455 This study was supported by a FFG Basisprogramm, grant number 36734898 (to  
456 G.ST Antivirals).

457

458 **CONFLICT OF INTERESTS**

459

460 L.W., S.C., V.K., A.A., X.C., D.S., A.-D.G., J.S. and G.G. are/were employees and/or  
461 shareholders of G.ST Antivirals, Vienna, Austria. G.G. and J.S. are co-inventors of  
462 patent application related to parts of the manuscript. M.K. and T.R.K. are employees  
463 and stockholders of Takeda Manufacturing Austria AG, Vienna, Austria.

464

465 **AUTHOR CONTRIBUTION**

466

467 L.W., M.K., S.C., V.K., A.A., X.C., D.S. and A.-D.G. performed experiments and  
468 analyzed data. D.B. and I.G. provided virus strains, reagents, and valuable input. A.-  
469 D.G., J.S., T.R.K., M.K. and G.G. were in charge of planning and directing the study.  
470 L.W and A.-D.G. wrote the manuscript with input from co-authors. All authors read  
471 and approved the final manuscript.

472



473 **FIGURE LEGENDS**

474

475 **Figure 1: Inhibition of RV replication by 2-DG in HeLa Ohio cells and HNECs.**

476 Intracellular viral RNA was assessed by qPCR 7 h post-infection at 0.005 TCID<sub>50</sub>/cell  
477 for the indicated RV strains in HeLa Ohio cells in medium containing 1g/L glucose  
478 (A). Comparison of IC<sub>50</sub> of 2-DG on the indicated RV strains under physiological  
479 versus conventional culture conditions (B). Intracellular viral RNA was assessed by  
480 qPCR 7 h post-infection at 4.5x10<sup>4</sup> TCID<sub>50</sub>/well for the indicated RV strains in HNECs  
481 (C). In (A) and (C) cells were treated with the indicated concentrations of 2-DG  
482 (represented on a log<sub>10</sub> scale) 1 h post-infection until samples were collected. The  
483 viability of HNECs was assessed at 7 h post-treatment with indicated concentrations  
484 of 2-DG (D). Graphs show pooled result ± SEM of 3-4 independent experiments.  
485 HNEC: human nasal epithelial cells, RV: rhinovirus.

486

487 **Figure 2: Intracellular storage of 2-DG6P after short-term exposure to 2-DG.**

488 2-DG uptake experimental setup (A). Luminescence-based measurements of  
489 intracellular 2-DG6P at the indicated times after HeLa Ohio cells (B) or HNECs (C)  
490 were exposed to 2-DG for 10 min. In (B) and (C), the left graphs show the 2-DG6P  
491 levels (in RLU) at time 0 min (i.e., immediately after 10 min 2-DG treatment), and the  
492 right graphs show percentage decay of 2-DG6P over time in HeLa Ohio and HNECs,  
493 respectively. Data show pooled result ± SEM of 2-3 independent experiments. RLU:  
494 relative luminescence units, HNEC: human nasal epithelial cells.

495

496 **Figure 3: 2-DG disrupts RNA template strand synthesis and inhibits RV-**

497 **mediated cell death.** HeLa Ohio cells were infected with RV-B14 (0.5 TCID<sub>50</sub>/cell)  
498 and treated with 10 mM 2-DG for 24 h to measure intracellular negative and positive  
499 viral RNA strand (A) or released extracellular viral RNA (B). Cells infected with RV-  
500 B14 (0.005 TCID<sub>50</sub>/cell) were treated with 3.57 mM 2-DG (IC<sub>90</sub> for RV-B14) for up to  
501 48 h at 34°C to measure viral load (C). Cells infected with RV-B14 (0.5 TCID<sub>50</sub>/cell)  
502 and treated with the indicated concentrations of 2-DG for 24 h or 48 h at 37 °C for  
503 measurement of virus-induced cytopathic effect (D). Graphs show pooled results ±  
504 SEM of 2-4 independent experiments (A,B,D) or one experiment (C). ns: non-

505 significant;  $p < 0.05$  (\* $p \leq 0.05$ , \*\* $p \leq 0.01$ , \*\*\* $p \leq 0.001$ , \*\*\*\* $p \leq 0.0001$ ). RV:  
506 rhinovirus. AU: Arbitrary units

507

508 **Figure 4: 2-DG shows a dose-dependent antiviral effect on human**  
509 **coronaviruses.** Viral load was measured from cell culture supernatants 24 h to 48 h  
510 post-infection. 2-DG treatment with the indicated concentrations was started 1 h post-  
511 infection. Viral load of SARS-CoV-2 (MOI 0.001) released from LLC-MK2 cells (A),  
512 HCoV-229E (MOI 0.01) released from MRC5 cells (B) and HCoV-NL-63 (MOI 0.01)  
513 released from LLC-MK2 cells (C). Graphs show pooled results  $\pm$  SEM of 3  
514 independent experiments. ns: non-significant;  $p < 0.05$  (\* $p \leq 0.05$ , \*\* $p \leq 0.01$ , \*\*\* $p \leq$   
515  $0.001$ , \*\*\*\* $p \leq 0.0001$ ). SARS-CoV-2: severe acute respiratory syndrome coronavirus  
516 2, HCoV: human coronavirus.

517

#### 518 **SUPPLEMENTARY MATERIALS**

519

520 **Supplement figure 1: Inhibition of RV replication by 2-DG in HeLa Ohio cells.**

521 Cells were cultivated in medium containing 2 g/L glucose. Intracellular viral RNA was  
522 assessed by qPCR 7 h post-infection at 0.005 TCID<sub>50</sub>/cell for the indicated RV strains  
523 in HeLa Ohio cells. Cells were treated with the indicated concentrations of 2-DG  
524 (represented on a log<sub>10</sub> scale) 1 h post-infection until the samples were collected.  
525 Graphs show pooled results  $\pm$  SEM of 3 independent experiments. RV: rhinovirus.

526 **Supplement table 1:** Materials used in the study.

527 **Supplement table 2:** IC<sub>50</sub> values of tested RV strains in HeLa Ohio and HNECs.

528

529 **REFERENCES**

- 530 [1] H. A. Rotbart and F. G. Hayden, "Picornavirus infections: a primer for the  
531 practitioner," *Archives of Family Medicine*, vol. 9, pp. 913–920, Mar. 2000, doi:  
532 10.1001/archfami.9.9.913.
- 533 [2] T. K. Cabeça, C. Granato, and N. Bellei, "Epidemiological and clinical features of  
534 human coronavirus infections among different subsets of patients," *Influenza and  
535 Other Respiratory Viruses*, vol. 7, pp. 1040–1047, Mar. 2013, doi:  
536 10.1111/irv.12101.
- 537 [3] K. K. W. To *et al.*, "Pulmonary and extrapulmonary complications of human  
538 rhinovirus infection in critically ill patients," *Journal of Clinical Virology: The  
539 Official Publication of the Pan American Society for Clinical Virology*, vol. 77, pp.  
540 85–91, Mar. 2016, doi: 10.1016/j.jcv.2016.02.014.
- 541 [4] S. Lee, S. S. Chiu, P. J. S. Malik, K. Chan, H. W. Wong, and Y. Lau, "Is  
542 respiratory viral infection really an important trigger of asthma exacerbations in  
543 children?," *European Journal of Pediatrics*, vol. 170, pp. 1317–1324, Mar. 2011,  
544 doi: 10.1007/s00431-011-1446-1.
- 545 [5] I. Hung *et al.*, "Unexpectedly Higher Morbidity and Mortality of Hospitalized  
546 Elderly Patients Associated with Rhinovirus Compared with Influenza Virus  
547 Respiratory Tract Infection," *International Journal of Molecular Sciences*, vol. 18,  
548 p. 259, Mar. 2017, doi: 10.3390/ijms18020259.
- 549 [6] D. Santesmasses *et al.*, "COVID-19 is an emergent disease of aging," *Aging Cell*,  
550 vol. 19, Mar. 2020, doi: 10.1111/accel.13230.
- 551 [7] D. M. Cutler and L. H. Summers, "The COVID-19 Pandemic and the 16 Trillion  
552 Virus," *JAMA*, vol. 324, Mar. 2020, doi: 10.1001/jama.2020.19759.
- 553 [8] A. M. Fendrick, A. S. Monto, B. Nightengale, and M. Sarnes, "The Economic  
554 Burden of Non-Influenza-Related Viral Respiratory Tract Infection in the United  
555 States," *Archives of Internal Medicine*, vol. 163, p. 487, Mar. 2003, doi:  
556 10.1001/archinte.163.4.487.
- 557 [9] A. C. Palmenberg *et al.*, "Sequencing and Analyses of All Known Human  
558 Rhinovirus Genomes Reveal Structure and Evolution," *Science (1979)*, vol. 324,  
559 pp. 55–59, Mar. 2009, doi: 10.1126/science.1165557.
- 560 [10] F. Hofer *et al.*, "Members of the low density lipoprotein receptor family mediate  
561 cell entry of a minor-group common cold virus.," *Proceedings of the National  
562 Academy of Sciences*, vol. 91, pp. 1839–1842, Mar. 1994, doi:  
563 10.1073/pnas.91.5.1839.
- 564 [11] B. A. Schuler *et al.*, "Major and minor group rhinoviruses elicit differential  
565 signaling and cytokine responses as a function of receptor-mediated signal  
566 transduction," *PloS One*, vol. 9, p. e93897, 2014, doi:  
567 10.1371/journal.pone.0093897.
- 568 [12] D. Blaas and R. Fuchs, "Mechanism of human rhinovirus infections," *Molecular  
569 and Cellular Pediatrics*, vol. 3, Mar. 2016, doi: 10.1186/s40348-016-0049-3.
- 570 [13] P. C. Y. Woo, Y. Huang, S. K. P. Lau, and K.-Y. Yuen, "Coronavirus Genomics  
571 and Bioinformatics Analysis," *Viruses*, vol. 2, pp. 1804–1820, Mar. 2010, doi:  
572 10.3390/v2081803.
- 573 [14] L. van der Hoek *et al.*, "Identification of a new human coronavirus," *Nature  
574 Medicine*, vol. 10, pp. 368–373, Mar. 2004, doi: 10.1038/nm1024.
- 575 [15] K. McIntosh, J. H. Dees, W. B. Becker, A. Z. Kapikian, and R. M. Chanock,  
576 "Recovery in tracheal organ cultures of novel viruses from patients with  
577 respiratory disease.," *Proc Natl Acad Sci U S A*, vol. 57, pp. 933–940, Mar. 1967,  
578 [Online]. Available: <https://www.ncbi.nlm.nih.gov/pmc/articles/PMC224637/>

- 579 [16] D. Hamre and J. J. Procknow, "A New Virus Isolated from the Human  
580 Respiratory Tract.," *Experimental Biology and Medicine*, vol. 121, pp. 190–193,  
581 Mar. 1966, doi: 10.3181/00379727-121-30734.
- 582 [17] L. Vijgen *et al.*, "Circulation of genetically distinct contemporary human  
583 coronavirus OC43 strains," *Virology*, vol. 337, pp. 85–92, Mar. 2005, doi:  
584 10.1016/j.virol.2005.04.010.
- 585 [18] J. O. Hendley, H. B. Fishburne, and J. M. Gwaltney, "Coronavirus infections in  
586 working adults. Eight-year study with 229 E and OC 43," *The American Review  
587 of Respiratory Disease*, vol. 105, pp. 805–811, Mar. 1972, doi:  
588 10.1164/arrd.1972.105.5.805.
- 589 [19] A. F. Bradburne, M. L. Bynoe, and D. A. Tyrrell, "Effects of a 'new' human  
590 respiratory virus in volunteers.," *British Medical Journal*, vol. 3, pp. 767–769, Mar.  
591 1967, [Online]. Available:  
592 <https://www.ncbi.nlm.nih.gov/pmc/articles/PMC1843247/>
- 593 [20] N. Kaur, R. Singh, Z. Dar, R. K. Bijarnia, N. Dhingra, and T. Kaur, "Genetic  
594 comparison among various coronavirus strains for the identification of potential  
595 vaccine targets of SARS-CoV2," *Infection, Genetics and Evolution*, p. 104490,  
596 Mar. 2020, doi: 10.1016/j.meegid.2020.104490.
- 597 [21] E. L. Sanchez and M. Lagunoff, "Viral activation of cellular metabolism," *Virology*,  
598 vol. 479–480, pp. 609–618, Mar. 2015, doi: 10.1016/j.virol.2015.02.038.
- 599 [22] K. A. Mayer, J. Stöckl, G. J. Zlabinger, and G. A. Gualdoni, "Hijacking the  
600 Supplies: Metabolism as a Novel Facet of Virus-Host Interaction," *Frontiers in  
601 Immunology*, vol. 10, Mar. 2019, doi: 10.3389/fimmu.2019.01533.
- 602 [23] S. K. Thaker, J. Ch'ng, and H. R. Christofk, "Viral hijacking of cellular  
603 metabolism," *BMC Biology*, vol. 17, Mar. 2019, doi: 10.1186/s12915-019-0678-9.
- 604 [24] A. C. Codo *et al.*, "Elevated Glucose Levels Favor SARS-CoV-2 Infection and  
605 Monocyte Response through a HIF-1 $\alpha$ /Glycolysis-Dependent Axis," *Cell  
606 Metabolism*, vol. 32, pp. 437–446.e5, Mar. 2020, doi:  
607 10.1016/j.cmet.2020.07.007.
- 608 [25] G. A. Gualdoni *et al.*, "Rhinovirus induces an anabolic reprogramming in host cell  
609 metabolism essential for viral replication," *Proceedings of the National Academy  
610 of Sciences*, vol. 115, pp. E7158–E7165, Mar. 2018, doi:  
611 10.1073/pnas.1800525115.
- 612 [26] P. Bissonnette, H. Gagne, A. Blais, and A. Berteloot, "2-Deoxyglucose transport  
613 and metabolism in Caco-2 cells," *American Journal of Physiology-  
614 Gastrointestinal and Liver Physiology*, vol. 270, pp. G153–G162, Mar. 1996, doi:  
615 10.1152/ajpgi.1996.270.1.g153.
- 616 [27] A. Waki *et al.*, "The importance of glucose transport activity as the rate-limiting  
617 step of 2-deoxyglucose uptake in tumor cells in vitro," *Nuclear Medicine and  
618 Biology*, vol. 25, pp. 593–597, Mar. 1998, doi: 10.1016/s0969-8051(98)00038-9.
- 619 [28] F. Bost, A.-G. Decoux-Pouillot, J. F. Tanti, and S. Clavel, "Energy disruptors:  
620 rising stars in anticancer therapy?," *Oncogenesis*, vol. 5, p. e188, Mar. 2016, doi:  
621 10.1038/oncsis.2015.46.
- 622 [29] H. T. Kang and E. S. Hwang, "2-Deoxyglucose: An anticancer and antiviral  
623 therapeutic, but not any more a low glucose mimetic," *Life Sciences*, vol. 78, pp.  
624 1392–1399, Mar. 2006, doi: 10.1016/j.lfs.2005.07.001.
- 625 [30] K. D. Passalacqua *et al.*, "Glycolysis Is an Intrinsic Factor for Optimal Replication  
626 of a Norovirus," *mBio*, vol. 10, Mar. 2019, doi: 10.1128/mbio.02175-18.

- 627 [31] K. A. Fontaine, E. L. Sanchez, R. Camarda, and M. Lagunoff, "Dengue Virus  
628 Induces and Requires Glycolysis for Optimal Replication," *Journal of Virology*,  
629 vol. 89, pp. 2358–2366, Mar. 2014, doi: 10.1128/jvi.02309-14.
- 630 [32] S. Wiehler and D. Proud, "Specific Assay of Negative Strand Template to  
631 Quantify Intracellular Levels of Rhinovirus Double-Stranded RNA," *Methods and*  
632 *Protocols*, vol. 4, p. 13, Mar. 2021, doi: 10.3390/mps4010013.
- 633 [33] K. J. Livak and T. D. Schmittgen, "Analysis of Relative Gene Expression Data  
634 Using Real-Time Quantitative PCR and the  $2^{-\Delta\Delta CT}$  Method," *Methods*, vol. 25,  
635 no. 4, pp. 402–408, Dec. 2001, doi: 10.1006/meth.2001.1262.
- 636 [34] L. J. REED and H. MUENCH, "A SIMPLE METHOD OF ESTIMATING FIFTY  
637 PER CENT ENDPOINTS<sup>12</sup>," *American Journal of Epidemiology*, vol. 27, no. 3,  
638 pp. 493–497, May 1938, doi: 10.1093/oxfordjournals.aje.a118408.
- 639 [35] A. N. Michi, B. G. Yipp, A. Dufour, F. Lopes, and D. Proud, "PGC-1 $\alpha$  mediates a  
640 metabolic host defense response in human airway epithelium during rhinovirus  
641 infections.," *Nat Commun*, vol. 12, no. 1, p. 3669, 2021, doi: 10.1038/s41467-  
642 021-23925-z.
- 643 [36] S. M. Warner, S. Wiehler, A. N. Michi, and D. Proud, "Rhinovirus replication and  
644 innate immunity in highly differentiated human airway epithelial cells.," *Respir*  
645 *Res*, vol. 20, no. 1, p. 150, Jul. 2019, doi: 10.1186/s12931-019-1120-0.
- 646 [37] L. van der Linden, K. C. Wolthers, and F. J. M. van Kuppeveld, "Replication and  
647 Inhibitors of Enteroviruses and Parechoviruses.," *Viruses*, vol. 7, no. 8, pp. 4529–  
648 62, Aug. 2015, doi: 10.3390/v7082832.
- 649 [38] O. Takeuchi and S. Akira, "Innate immunity to virus infection.," *Immunol Rev*, vol.  
650 227, no. 1, pp. 75–86, Jan. 2009, doi: 10.1111/j.1600-065X.2008.00737.x.
- 651 [39] L. Deszcz, E. Gaudernak, E. Kuechler, and J. Seipelt, "Apoptotic events induced  
652 by human rhinovirus infection," *Journal of General Virology*, vol. 86, pp. 1379–  
653 1389, Mar. 2005, doi: 10.1099/vir.0.80754-0.
- 654 [40] J. P. Garnett, E. H. Baker, and D. L. Baines, "Sweet talk: insights into the nature  
655 and importance of glucose transport in lung epithelium," *European Respiratory*  
656 *Journal*, vol. 40, pp. 1269–1276, Mar. 2012, doi: 10.1183/09031936.00052612.
- 657 [41] S. E. Bell, D. M. Quinn, G. L. Kellett, and J. R. Warr, "2-Deoxy-D-glucose  
658 preferentially kills multidrug-resistant human KB carcinoma cell lines by  
659 apoptosis.," *Br J Cancer*, vol. 78, no. 11, pp. 1464–70, Dec. 1998, doi:  
660 10.1038/bjc.1998.708.
- 661 [42] R. L. Aft, F. W. Zhang, and D. Gius, "Evaluation of 2-deoxy-D-glucose as a  
662 chemotherapeutic agent: mechanism of cell death.," *Br J Cancer*, vol. 87, no. 7,  
663 pp. 805–12, Sep. 2002, doi: 10.1038/sj.bjc.6600547.
- 664 [43] M. C. Coleman *et al.*, "2-deoxy-D-glucose causes cytotoxicity, oxidative stress,  
665 and radiosensitization in pancreatic cancer.," *Free Radic Biol Med*, vol. 44, no. 3,  
666 pp. 322–31, Feb. 2008, doi: 10.1016/j.freeradbiomed.2007.08.032.
- 667 [44] [https://clinicaltrials.gov/ct2/show/NCT05314933?term=NCT05314933&](https://clinicaltrials.gov/ct2/show/NCT05314933?term=NCT05314933&cntry=AT&draw=2&rank=1)  
668 [cntry=AT &draw=2&rank=1.](https://clinicaltrials.gov/ct2/show/NCT05314933?term=NCT05314933&cntry=AT&draw=2&rank=1)"
- 669 [45] S. Nirwan and R. Kakkar, "Rhinovirus RNA Polymerase," *Viral Polymerases*, pp.  
670 301–331, 2019, doi: 10.1016/B978-0-12-815422-9.00011-5.
- 671 [46] L. van der Linden, K. C. Wolthers, and F. J. M. van Kuppeveld, "Replication and  
672 Inhibitors of Enteroviruses and Parechoviruses," *Viruses*, vol. 7, pp. 4529–4562,  
673 Mar. 2015, doi: 10.3390/v7082832.
- 674 [47] P. A. B. Wark *et al.*, "Asthmatic bronchial epithelial cells have a deficient innate  
675 immune response to infection with rhinovirus," *The Journal of Experimental*  
676 *Medicine*, vol. 201, pp. 937–947, Mar. 2005, doi: 10.1084/jem.20041901.

- 677 [48] D. Bojkova *et al.*, “Proteomics of SARS-CoV-2-infected host cells reveals therapy  
678 targets,” *Nature*, Mar. 2020, doi: 10.1038/s41586-020-2332-7.
- 679 [49] K. K. Sahu and R. Kumar, “Role of 2-Deoxy-D-Glucose (2-DG) in COVID-19  
680 disease: A potential game-changer.,” *J Family Med Prim Care*, vol. 10, no. 10,  
681 pp. 3548–3552, Oct. 2021, doi: 10.4103/jfmprc.jfmprc\_1338\_21.
- 682 [50] Y. Watanabe, T. A. Bowden, I. A. Wilson, and M. Crispin, “Exploitation of  
683 glycosylation in enveloped virus pathobiology,” *Biochimica et Biophysica Acta*  
684 (*BBA*) - *General Subjects*, vol. 1863, pp. 1480–1497, Mar. 2019, doi:  
685 10.1016/j.bbagen.2019.05.012.
- 686 [51] A. N. Bhatt *et al.*, “Glycolytic inhibitor 2-deoxy-d-glucose attenuates SARS-CoV-2  
687 multiplication in host cells and weakens the infective potential of progeny virions,”  
688 *Life Sciences*, vol. 295, p. 120411, Mar. 2022, doi: 10.1016/j.lfs.2022.120411.  
689  
690

Figure 1

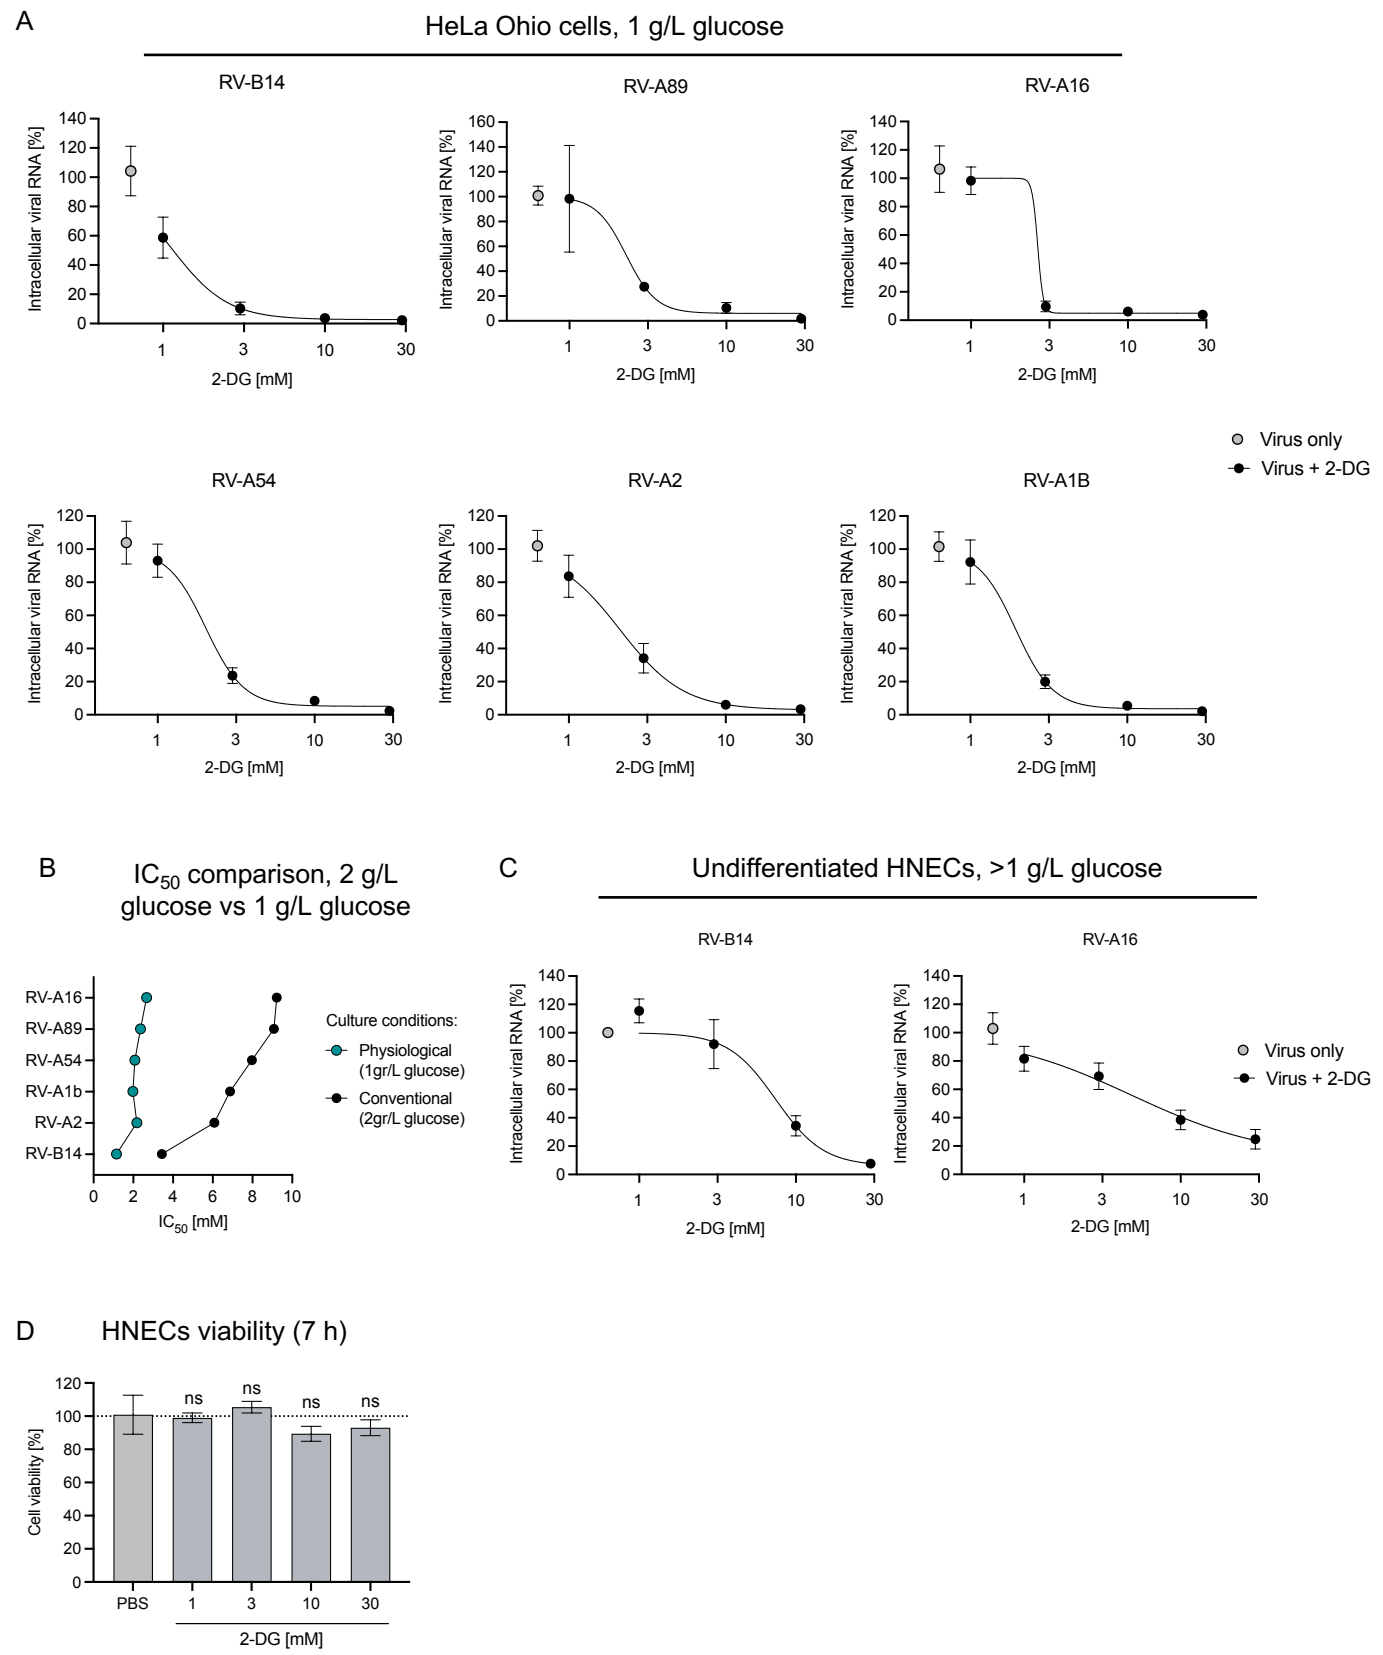

Figure 2

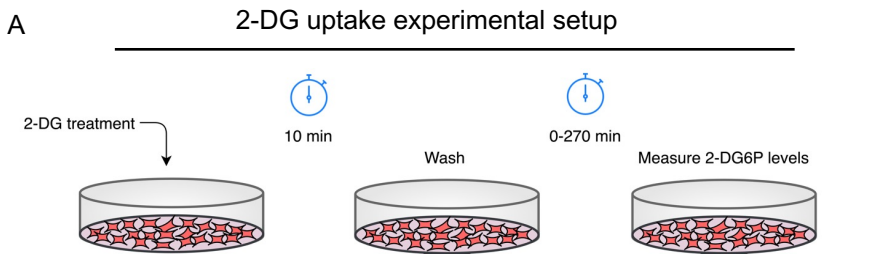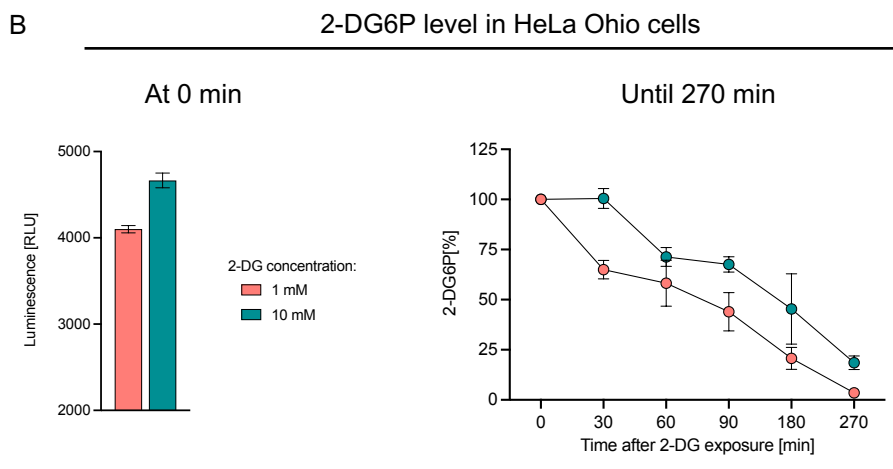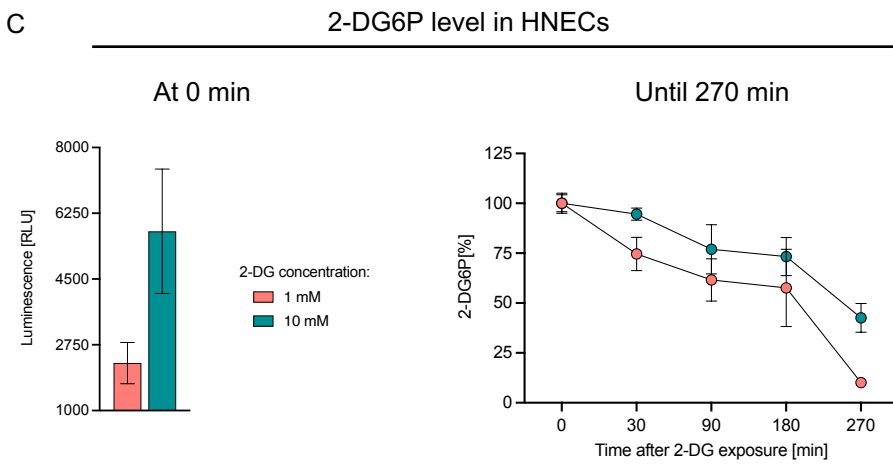



Figure 3

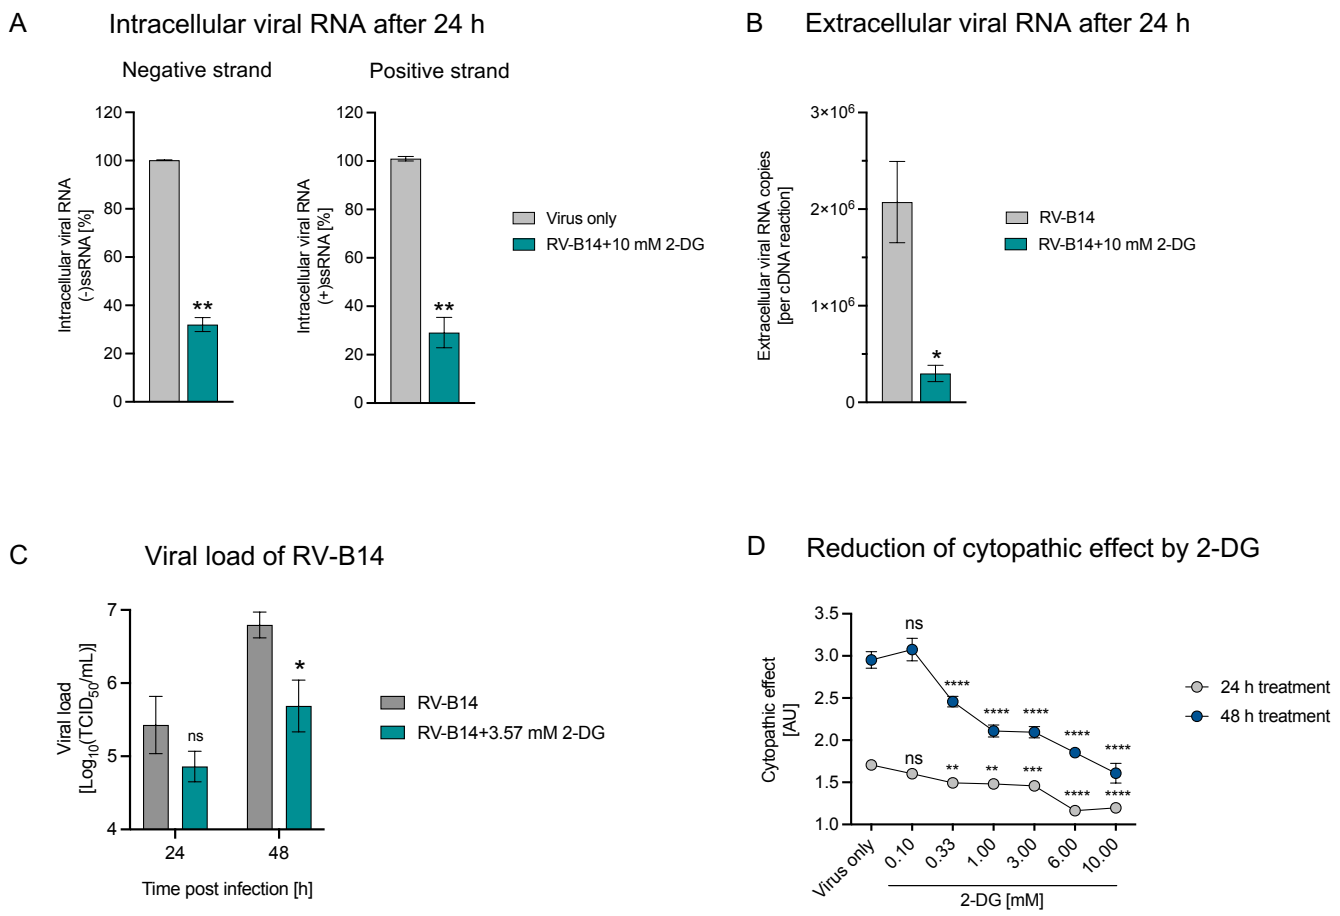

Figure 4

**A** Viral load of SARS-CoV-2

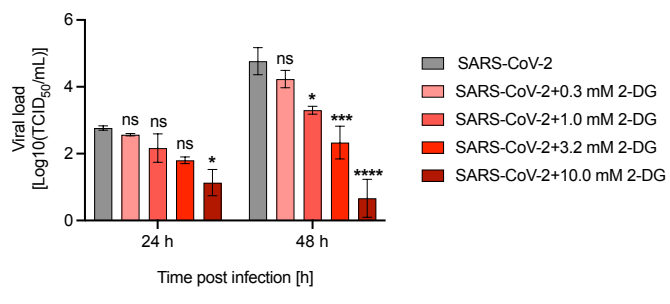

**B** Viral load of HCoV-229E

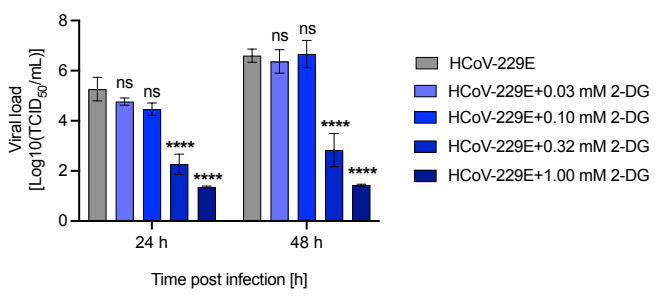

**C** Viral load of HCoV-NL63

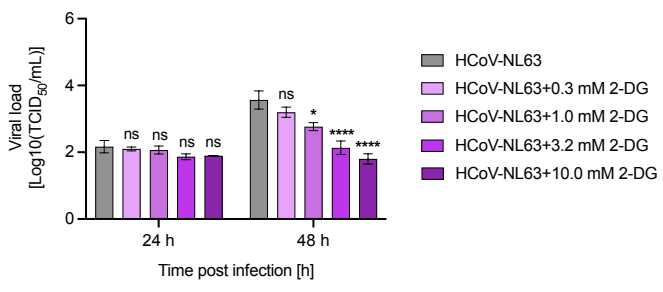

Source: http://biorxiv.org/content/10.1101/2022.05.24.493068v2.full.pdf
