1 **Host-directed therapy with 2-Deoxy-D-glucose inhibits human rhinoviruses,**  
2 **endemic coronaviruses, and SARS-CoV-2**

3

4 Laxmikant Wali<sup>1,5</sup>, Michael Karbiener<sup>2,5</sup>, Sharon Chou<sup>1</sup>, Vitalii Kovtunyk<sup>1</sup>, Adam  
5 Adonyi<sup>1</sup>, Irene Gösler<sup>3</sup>, Ximena Contreras<sup>1</sup>, Delyana Stoeva<sup>1</sup>, Dieter Blaas<sup>3</sup>,  
6 Johannes Stöckl<sup>4</sup>, Thomas R. Kreil<sup>2</sup>, Guido A. Gualdoni<sup>1</sup> and Anna-Dorothea Gorki<sup>1,6</sup>

7

8 <sup>1</sup> G.ST Antivirals GmbH, Austria

9 <sup>2</sup> Global Pathogen Safety, Takeda Manufacturing Austria AG , Austria

10 <sup>3</sup> Center of Medical Biochemistry, Max Perutz Labs, Vienna Biocenter, Medical  
11 University of Vienna, Austria

12 <sup>4</sup> Institute of Immunology, Center of Pathophysiology, Immunology & Infectiology,  
13 Medical University of Vienna, Austria

14 <sup>5</sup> Contributed equally

15 <sup>6</sup> Corresponding author

16

17 Abstract word count: 122

18 Text word count: 3470

19 Figures: 5 Main Figures

20

21 Corresponding Author:

22 Anna-Dorothea Gorki, PhD,

23 G.ST Antivirals GmbH,

24 Doktor-Bohr-Gasse 7 (VBC6) 1030 Vienna, Austria

25 Phone: +43 6641869461

26 E-mail: [anna-dorothea.gorki@gst-antivirals.com](mailto:anna-dorothea.gorki@gst-antivirals.com)

27 **KEYWORDS:** antiviral, broad-spectrum antiviral therapy, 2-DG, rhinovirus,  
28 coronavirus, SARS-CoV-2

29

### 30 **HIGHLIGHTS**

31

- 32 • 2-DG, a glucose analogue, inhibits RV RNA replication and reduces RV-  
33 mediated cell death *in vitro*.
- 34 • 2-DG exhibits increased inhibitory activity against RV in physiological glucose  
35 concentrations *in vitro*.
- 36 • 2-DG attenuates viral load of pandemic and endemic CoVs *in vitro*.

37

### 38 **ABSTRACT**

39

40 Rhinoviruses (RVs) and coronaviruses (CoVs) upregulate host cell metabolic  
41 pathways including glycolysis to meet their bioenergetic demands for rapid  
42 multiplication. Using the glycolysis inhibitor 2-deoxy-D-glucose (2-DG), we confirm  
43 the dose-dependent inhibition of minor- and major-receptor group RV replication. We  
44 demonstrate that 2-DG suppresses viral positive- as well as negative-strand RNA  
45 synthesis, resulting in lower amounts of progeny virus and RV-mediated cell death. In  
46 tissue culture with physiologic glucose levels, 2-DG has a pronounced antiviral effect.  
47 Further, assessment of 2-DG's intracellular kinetics revealed that the active  
48 intermediate, 2-DG6P, is stored intracellularly for several hours. Our concurrent study  
49 of 2-DG's impact on pandemic SARS-CoV-2 and endemic HCoVs demonstrated a  
50 significant reduction in viral load. Collectively, these results suggest 2-DG to be a  
51 broad-spectrum antiviral.

52

### 53 **INTRODUCTION**

54

55 Rhinoviruses (RVs) and endemic coronaviruses (HCoVs) are the major cause of  
56 acute respiratory tract (RT) infections in humans [1], [2]. These are largely self-  
57 limiting in healthy adults, where they usually remain confined to the upper respiratory  
58 tract. However, as the viruses spread rapidly and circulate seasonally, they lead to  
59 high incidence rates on an annual basis. These can cause severe morbidity in

60 elderly, children, and immune-compromised patients [3]–[6]. Along with human  
61 suffering, these viral infections lead to high economic losses and healthcare costs [7],  
62 [8]. While global efforts are underway to develop an effective therapy, the current lack  
63 of FDA-approved antivirals has limited the treatment of RT infections to supportive  
64 and symptomatic care.

65

66 As *Picornaviridae*, RVs are non-enveloped and contain a positive-sense single-  
67 stranded RNA genome ((+)ssRNA) [9]. They are divided into three species, RV-A,  
68 RV-B and RV-C. RV-A and RV-B are further classified as minor- and major-group  
69 based on the cognate host cell receptors they use for cell entry [10]–[12].  
70 Coronaviruses (CoVs) are enveloped viruses, belong to the *Coronaviridae* family and  
71 contain a (+)ssRNA genome as well [13]. They are classified into four major genera:  
72 alpha, beta, gamma, and delta, targeting a variety of host species. In humans, strains  
73 from the alpha [14]–[16] and beta genera [17] are known to induce common colds  
74 similar to the ones caused by RVs [18], [19]. However, three strains from the beta  
75 genus, including Severe Acute Respiratory Syndrome Coronavirus 2 (SARS-CoV-2)  
76 were found to be more pathogenic with high fatality rates [20].

77

78 Viruses are dependent on the host cell metabolism and host cell machinery to ensure  
79 their replication. RVs and CoVs in particular are known to hijack and reprogram the  
80 host cell metabolic pathways for rapid multiplication, causing an increase in  
81 bioenergetic demand [21], [22]. This leads to an elevated anabolic state, forcing the  
82 host cell to synthesize more lipids and nucleotides using glucose and glutamine as  
83 substrates [23]. In addition, there is an increased demand for energy in the form of  
84 adenosine triphosphate (ATP) for viral replication and assembly, which is  
85 predominantly provided by glycolysis [23]–[25]. As an essential metabolic pathway,  
86 this involves breakdown of hexoses like glucose into pyruvate for ATP production.  
87 This dependency of RVs and CoVs, and presumably other viruses on host glucose  
88 metabolism for replication presents a promising target for the development of  
89 effective antiviral therapies.

90

91 2-Deoxy-D-glucose (2-DG), a stable analogue of glucose, is taken up by cells via  
92 glucose transporters and subsequently phosphorylated to 2-deoxy-D-glucose-6-  
93 phosphate (2-DG6P) by hexokinase [26], [27]. Unlike in glucose metabolism, 2-DG6P

94 cannot be further metabolized by phosphoglucose isomerase [28]. This leads to  
95 intracellular accumulation of 2-DG6P and arrest of glycolysis at the initial stage,  
96 causing depletion of glucose derivatives and substrates crucial for viral replication  
97 [29]. Previously, it has been demonstrated that 2-DG affects viral replication by  
98 reverting virus-induced metabolic reprogramming of host cells [24], [25], [30], [31].

99

100 In the present study, we investigated the antiviral activity of 2-DG against minor- and  
101 major-group RVs in epithelial cells including primary human nasal epithelial cells, the  
102 main site of RV replication. Concomitantly, we explored the effect of glucose on the  
103 antiviral activity of 2-DG and characterized 2-DG's intracellular kinetics. To better  
104 understand the inhibitory activity of 2-DG on the RV replication cycle, we quantified  
105 both the (+)ssRNA as well as the template (-)ssRNA strand. In addition, we analyzed  
106 the 2-DG's effect on RV-mediated cell death. Finally, we assessed the antiviral  
107 activity of 2-DG against endemic CoVs as well as the pandemic SARS-CoV-2 strain.  
108 Reverting virus-induced metabolic reprogramming by 2-DG treatment critically  
109 affected viral RNA replication and thus holds great potential in combating respiratory  
110 viral infections.

111

112

## 113 **METHODS**

114

115 Details of all materials used are listed in Supplement Table 1.

116

117 **Cell culture.** Cells were seeded in 24-well tissue culture plates and incubated at 37  
118 °C in media and densities (cells per well) for the given times as indicated below;  
119 human nasal epithelial cells (HNECs) in HNEC medium at  $4.5 \times 10^4$  (72 h) and HeLa  
120 Ohio cells in HeLa Ohio medium at  $2 \times 10^5$  (16-20 h). LLC-MK2 and MRC-5 cells were  
121 cultured in T25 cell culture flasks in the corresponding media at densities of  $8 \times 10^5$   
122 and  $9 \times 10^5$ , respectively. The details of the culture medium and supplements used are  
123 listed in Supplement Table 1.

124

125 **Viral infection and 2-DG treatment.** HeLa Ohio cells and HNECs were infected for  
126 1 h at 37 °C or 34 °C with RV at 0.005 to 0.5 TCID<sub>50</sub>/cell and  $4.5 \times 10^4$  TCID<sub>50</sub>/well,  
127 followed by treatment with 2-DG for 6 h, 24 h or 48 h. The supernatant from the cells  
128 were then subjected to virus titer analysis or, the cells were treated with cell lysis  
129 buffer for RNA extraction. LLC-MK2 cells and MRC-5 cells were infected with SARS-  
130 CoV-2 (Beta-CoV/Germany/BavPat1/2020) (MOI of 0.001) at 36 °C and HCoV-229E  
131 (MOI of 0.01) at 36 °C or HCoV-NL63 (MOI of 0.01) at 33 °C, respectively. Cells were  
132 treated with 2-DG 1 h post-infection and samples were collected at the indicated  
133 times for virus titer analysis.

134

135 **RNA isolation and cDNA synthesis.** Intra- and extra-cellular RNA was isolated  
136 according to the ExtractMe Total RNA Kit instructions. To avoid bias in extracellular  
137 RNA isolation, an internal spike-in RNA control was added to each sample. RNA  
138 concentration and purity was assessed using a nanophotometer. cDNA was  
139 synthesized according to the First strand cDNA synthesis kit using the program: 37  
140 °C for 60 min and 70 °C for 5 min. Measurement of viral negative strand RNA ((-  
141 )RNA) was performed as previously described [32] except that the synthesized cDNA  
142 wasn't RNase treated and purified. The cDNA from (-)RNA was synthesized using a  
143 mix of strand-specific, chimeric sequences-containing primer chimHRV-b14\_RT and  
144 control primer HPRT\_R (Supplement Table 1) instead of oligo(dT).

145

146 **qPCR.** qPCR was performed using SYBR green mix and primers as described in  
147 Supplement Table 1. For measuring intracellular viral RNA, gene expression was  
148 normalized to HPRT using the Livak method [33] and expressed as fold change to  
149 control (infected, but untreated). Primers HRV-B14\_R and chimHRV-b14\_R1 were  
150 used for measurement of viral (-)RNA. For extracellular viral RNA, synthetic oligo  
151 standard (HRV-B14\_F, HRV-B14\_R and HRV-B14 primer amplicon, Supplement  
152 Table 1) were used to generate a standard curve for the calculation of viral copy  
153 number by interpolation. Based on the qPCR data, the IC<sub>50</sub> was calculated using  
154 least square regression on Prism 9.0.2.

155

156 **Virus titration.** Samples from SARS-CoV-2, HCoV-229E and HCoV-NL63 were  
157 titrated on Vero cells, MRC-5 cells, and LLC-MK2 cells, respectively. Samples from  
158 RV-B14 were titrated on HeLa Ohio cells. Titration was performed using eightfold  
159 replicates of serial half-log<sub>10</sub> (for SARS-CoV-2, HCoV-229E and HCoV-NL63) or log<sub>10</sub>  
160 (for RV-B14) dilutions of virus-containing samples followed by incubation at 36 °C  
161 (SARS-CoV-2, HCoV-229E), 33 °C (HCoV-NL63) and 34 °C (RV-B14) for 5-7 days  
162 (SARS-CoV-2, HCoV-229E, RV-B14) or 9-11 days (HCoV-NL63). Wells were  
163 inspected under a microscope for cytopathic effect (CPE). For RV-B14, CPE was  
164 visualized by crystal violet staining. Recognizable CPE at each tested dilution was  
165 used to determine the dose according to Reed and Muench [34] and reported as  
166 log<sub>10</sub>-transformed median tissue culture infectious dose per milliliter  
167 (log<sub>10</sub>[TCID<sub>50</sub>/mL]).

168

169 **Virus-induced cytopathic effect.** HeLa Ohio cells were infected for 1 h at 37 °C  
170 with RV-B14 (0.5 TCID<sub>50</sub>/cell) followed by 2-DG treatment for 24 h or 48 h at 37 °C.  
171 CPE was visualized by crystal violet staining. The effect of 2-DG on virus-induced cell  
172 death was assessed by calculating the ratio of the average of treated, uninfected to  
173 each treated, infected sample value.

174

175 **Crystal violet staining.** Cells were incubated with crystal violet solution (0.05%  
176 crystal violet in 20% methanol) for 30-60 min, washed with ddH<sub>2</sub>O, air-dried, followed  
177 by 25% glacial acetic acid. The absorbance was recorded at 450nm.

178

179 **Glucose-uptake assay.** Cells were treated with 2-DG in the absence of glucose for  
180 10 min at 37 °C, followed by washing with PBS and incubation for up to 270 min in  
181 glucose-free medium. 2-DG uptake was assessed using the Glucose-Uptake Glo™  
182 Assay kit. Luminescence was recorded on a microplate reader. 2-DG6P levels were  
183 calculated as percentage of signal upon exposure to 2-DG after subtracting the  
184 background value obtained from control samples (not treated with 2-DG).

185

186 **Statistical analysis.** The graphs show pooled results of independent experiments  
187 with each experiment containing two to four cell culture wells per condition with the  
188 standard error of the mean (SEM). Analysis of statistical significance was performed  
189 using Student's *t*-test (unpaired analysis) or 2-way-ANOVA with Bonferroni's  
190 correction and considered significant when  $p < 0.05$  (\* $p \leq 0.05$ , \*\* $p \leq 0.01$ , \*\*\* $p \leq$   
191  $0.001$ , \*\*\*\* $p \leq 0.0001$ ).

192 **RESULTS**

193

194 **2-DG inhibits RV replication in HeLa Ohio cells and HNECs**

195

196 2-Deoxyglucose (2-DG) treatment has been shown to inhibit rhinovirus (RV) infection  
197 by reverting RV-induced anabolic reprogramming of host cell metabolism [25]. First,  
198 we determined whether similar results [25] could be observed not only for RV-B14,  
199 used in the above-mentioned study, but also for additional RV strains from the minor-  
200 group (RV-A1B, RV-A2) and the major-group (RV-A89, RV-A16, RV-A54). HeLa Ohio  
201 cells were infected under conventional culture conditions using a medium containing  
202 2 g/L glucose. We found that 2-DG treatment led to a dose-dependent reduction in  
203 intracellular viral RNA levels of all major- and minor-group RVs tested (Figure 1A).  
204 The highest tested concentration of 2-DG (30 mM) showed a reduction in intracellular  
205 viral RNA of up to 96.1 %  $\pm$  2.9 % (mean  $\pm$  SEM) in RV-B14 (Figure 1A). These  
206 results are consistent with the previous study in which 2-DG inhibited RV-B14  
207 replication in HeLa cells and in primary human fibroblasts [25]. We then evaluated  
208 the effect of 2-DG on RV-B14 and RV-A16 replication in human nasal epithelial cells  
209 (HNECs), the natural replication site for rhinoviruses. In line with the previous  
210 findings, 10 mM and 30 mM 2-DG treatment strongly inhibited RV-B14 and RV-A16  
211 replication (Figure 1B). To be noted, unlike in HeLa Ohio cell culture medium, where  
212 the glucose level is known, glucose levels in HNECs culture medium are not  
213 disclosed by the manufacturer. Together, the data suggests that 2-DG inhibits RV  
214 replication in a dose-dependent manner, independent of the viral strain and cell type  
215 used.

216

217 **Inhibitory activity of 2-DG is dependent on glucose level**

218 2-DG, a glucose analogue, is transported into cells utilizing the same transporters as  
219 glucose, resulting in a competition for the uptake of 2-DG [26], [27]. The glucose  
220 concentration in conventional cell culture media ranges from 2 g/L to 4.5 g/L. This is  
221 much higher than *in vivo* glucose levels (e.g., in the blood, which is in the range of  
222 3.9 to 5.6 mmol/L i.e., 0.7 to 1 g/L). To understand the uptake and activity of 2-DG at  
223 physiological glucose levels, we reduced the glucose concentration in the cell culture  
224 medium to 1 g/L to mimic a setting corresponding to human plasma. As in the  
225 conventional cell culture setup above (Figure 1), HeLa Ohio cells were separately



226 infected with six different RV strains. Again, we observed that 2-DG suppressed RV  
227 replication in a dose-dependent manner, with 30 mM 2-DG leading to complete  
228 abolishment of RV replication (Figure 2A). In addition, 3 mM and 10 mM 2-DG  
229 caused a pronounced reduction in intracellular viral RNA for all tested RV strains  
230 (Figure 2A). In line with these results, the absolute half-maximal inhibitory  
231 concentration (IC<sub>50</sub>) of 2-DG was lower under physiological glucose conditions  
232 (Figure 2B, Supplementary Table 2). The IC<sub>50</sub> ranged from 1.92 mM to 2.67 mM as  
233 compared to 3.44 mM to 9.22 mM for cells infected and treated under conventional  
234 culture conditions (i.e., in the presence of 2 g/L glucose). These results indicate  
235 better uptake and enhanced activity of 2-DG at physiological glucose levels.

236

### 237 **A short exposure to 2-DG leads to extended intracellular storage of 2-DG6P**

238

239 Once 2-DG is taken up by the cell, it is phosphorylated to 2-deoxy-D-glucose-6-  
240 phosphate (2-DG6P), which leads to the arrest of glycolysis and altering of viral  
241 replication [25]. Thus, the kinetics of cellular uptake and intracellular storage are  
242 crucial for the antiviral activity of 2-DG. Therefore, we investigated the intracellular  
243 concentration kinetics of 2-DG6P in HeLa Ohio cells and HNECs. Cells were treated  
244 with 1 mM and 10 mM 2-DG, respectively, for 10 min. At time zero (immediately after  
245 the 10 min 2-DG treatment), higher 2-DG6P levels were observed in 10 mM 2-DG  
246 treatment compared to 1 mM 2-DG treatment, in both HeLa Ohio cells and HNECs  
247 (Figure 3A, 3B, left graph). The intracellular 2-DG6P level measured at time zero was  
248 then set to 100 %, and the percentage decay of 2-DG6P over time was calculated. In  
249 HeLa Ohio cells 3.5 % ± 0.6 % (mean±SEM) and 18.5 % ± 3.4 % 2-DG6P were  
250 measured in 1 mM and 10 mM 2-DG treated cells after 270 min (Figure 3A). In the  
251 case of HNECs, higher levels of 2-DG6P retention were observed after 270min;  
252 10.1% ± 1.5% and 42.6 % ± 7.2 % 2-DG6P being detected in 1 mM and 10 mM 2-DG  
253 treated cells (Figure 3B), respectively. Collectively, the data suggest that short  
254 exposure of the cells to 2-DG leads to an intracellular accumulation of the active  
255 intermediate 2-DG6P for several hours.

256

### 257 **2-DG disrupts RNA template strand synthesis and inhibits RV-mediated cell** 258 **death**

259 After confirming that 2-DG strongly suppresses RV replication and has a pronounced  
260 effect at physiological glucose conditions, we further investigated which step of the  
261 RV replication cycle was targeted. First, we analyzed the influence of 2-DG on  
262 synthesis of (-)ssRNA and of (+)ssRNA, 24h post-infection. Consistent with the  
263 above findings of intracellular virus levels after 7 h post-infection (Figure 2A), 10 mM  
264 2-DG treatment led to a significant decrease in (+)ssRNA levels of RV-B14 at 24 h  
265 post-infection (Figure 4A). This result was closely mirrored by decrease in the (-  
266 )ssRNA template strand upon 2-DG treatment (Figure 4A). Simultaneously, we found  
267 that 2-DG treatment led to a significant decrease in the number of viral RNA copies in  
268 the supernatant (Figure 4B), implying an impairment of the amount of released virus.  
269 Next, we assessed 2-DG's impact on viral load by means of median tissue culture  
270 infectious dose (TCID<sub>50</sub>) assays. RV-B14 infected HeLa Ohio cells were treated with  
271 2-DG at 3.57 mM, corresponding to IC<sub>90</sub>, up to 48 h and the supernatants containing  
272 progeny virus were collected every 24 h and analyzed. The above IC<sub>90</sub> concentration  
273 of 2-DG was calculated from the previously derived dose-response curve in HeLa  
274 Ohio cells (Figure 2A, RV-B14). In comparison to the untreated cells, 2-DG treated  
275 cells showed a clear reduction in viral load 48 h post-infection (Figure 4C).  
276 A characteristic of RV infection of tissue culture cells is the cytopathic effect (CPE)  
277 [35]. The impact of increasing concentrations of 2-DG on RV-induced cell death was  
278 assessed in HeLa Ohio cells at 24 h and 48 h post-infection. A significant protective  
279 effect was seen in cells treated with 2-DG at 1 mM or higher after 24 h (Figure 4D).  
280 At 48 h post-infection, the CPE was stronger in untreated cells ('Virus only') but,  
281 again, cell death was significantly reduced upon treatment with 2-DG at 0.33 mM or  
282 higher (Figure 4D). Together, these results suggest that 2-DG affects the RV life  
283 cycle by suppressing viral RNA replication and viral load and reduces RV-mediated  
284 cell death.

285

## 286 **2-DG decreases CoV viral load**

287

288 Similar to RVs, SARS-CoV-2 was recently shown to exploit the host glucose  
289 metabolism for replication and can potentially be targeted by 2-DG [24], [35]. With  
290 this rationale we investigated the effect of 2-DG on the viral load of the pandemic  
291 strain, SARS-CoV-2, as well as the two endemic human CoV stains, HCoV-229E and  
292 HCoV-NL63. Cells with known susceptibility to these coronaviruses were treated with

293 increasing doses of 2-DG for 24 h to 48 h. The supernatant containing released virus  
294 was sampled every 24 h and viral load was assessed as TCID<sub>50</sub>. We observed a  
295 significant reduction in SARS-CoV-2 at 24 h post-infection at the highest tested 2-DG  
296 concentration (10 mM), and further, lower 2-DG concentrations led to significant  
297 effects 48h post-infection (Figure 5A). A similar behavior was observed for HCoV-  
298 229E, where 24 h and 48 h post-infection a significant reduction in viral load was  
299 observed in cells treated with 0.32 mM and 1 mM 2-DG (Figure 5B). The use of lower  
300 2-DG concentrations was based on decreased viability of MRC5 cells at 2-DG  
301 concentrations above 1 mM (data not shown). In the case of HCoV-NL63, there was  
302 no significant decrease in viral load at 24 h, however, at 48 h post-infection 2-DG  
303 concentrations above 1 mM suppressed viral load significantly (Figure 5C). These  
304 results suggest that 2-DG exerts a dose-dependent reduction in viral load of  
305 pandemic as well as endemic CoV strains.  
306

## 307 **DISCUSSION**

308

309 In this study we investigated a host-directed approach to combat rhinovirus (RV) and  
310 coronavirus (CoV) infection by using 2-Deoxy-D-glucose (2-DG). This approach is  
311 based on the understanding that virus-induced metabolic reprogramming of the host  
312 cell plays a crucial role in viral replication [21], [22], [25]. Previously, Gualdoni et al.,  
313 [25] demonstrated that 2-DG reverts RV-induced metabolic reprogramming of host  
314 cells and inhibits RV-B14 replication. Consequently, in the present study, we sought  
315 to further elucidate the implications of 2-DG on the RV replication cycle, the  
316 intracellular kinetics of 2-DG and its impact on CoV viral load. We found that 2-DG  
317 treatment led to a marked inhibition of positive strand as well as negative strand RNA  
318 replication. 2-DG treatment caused a significant reduction in the extracellular viral  
319 RNA level and RV viral load as well as in the RV-mediated cytopathic effect. At a  
320 physiological glucose concentration, 2-DG treatment led to enhanced inhibition of RV  
321 replication as compared to conventional high-glucose culture conditions. Assessment  
322 of 2-DG's intracellular kinetics showed accumulation of the active intermediate, 2-  
323 DG6P, for several hours. Our concurrent study of 2-DG's impact on CoVs also  
324 showed a significant reduction in viral load. Taken together, the results suggest 2-DG  
325 to be a broad-spectrum antiviral.

326

327 In our study, treatment with 2-DG inhibited replication of all tested minor- and major-  
328 receptor group strains of RV in HeLa Ohio cells under conventional culture condition  
329 (i.e., 2 g/L glucose) and in primary human nasal epithelial cells (HNECs) (Figure 1).  
330 As 2-DG competes with glucose for cellular uptake [26], [27], we lowered the glucose  
331 concentration to 1 g/L glucose – mimicking the human plasma glucose concentration  
332 – to assess the efficacy of 2-DG in a physiological context. We found that lower  
333 glucose concentrations potentiated 2-DG-mediated inhibition of RV replication,  
334 pointing to a higher efficacy of 2-DG in physiological settings (Figure 2, Supplement  
335 Table 2). It should be noted that the glucose concentration in fluid lining the nose and  
336 lung epithelium in humans is around 12.5 times lower than in plasma [36]. Therefore,  
337 it can be anticipated that 2-DG exhibits even higher antiviral efficacy in therapeutic  
338 target tissues. However, additional studies in models closer to the physiologic  
339 conditions are warranted to test this hypothesis.

340

341 In the next step, we characterized the intracellular kinetics of 2-DG. In the cell, 2-DG  
342 is phosphorylated to 2-DG6P, leading to its intracellular accumulation. Cytochalasin  
343 B, an inhibitor of the glucose transporter, was used as a control to ensure 2-DG6P  
344 specificity in our set-up (data not shown). Overall, we found that 2-DG6P was  
345 detectable up to several hours in HeLa Ohio cells and HNEC after a short incubation  
346 of the cells with 2-DG.

347

348 During the RV replication cycle, the viral polyprotein is first generated via translation  
349 from the (+)ssRNA genome, which is then processed by viral proteases to generate  
350 viral proteins including the viral RNA polymerase [37]. Next, RNA polymerase  
351 generates (-)RNA strand copies, which in turn serve as a template for the multifold  
352 replication of the positive strand viral genome to be packaged in viral capsids, finally  
353 leading to release of the mature virions [38]. As conventional RT-PCR holds  
354 limitations to detect the negative strand in excess of positive strand copies, we  
355 employed a recently published strategy by Wiehler and Proud [32] to analyze the  
356 negative strand level. We observed that 2-DG significantly reduced the genomic  
357 (+)ssRNA as well as the template (-)ssRNA, a likely cause for the measured  
358 significant reduction in detectable extracellular viral RNA (Figure 4A&B). These  
359 findings point at a 2-DG-mediated impairment in viral RNA replication and amount of  
360 released virus. In line with this, titration of the released virus on HeLa Ohio cells  
361 showed a reduction in viral load (Figure 4C). To be noted, HeLa Ohio cells used in  
362 this experimental setup, due to their cancerous origin, have a high glucose demand  
363 and are especially sensitive to glucose starvation and 2-DG treatment. Therefore, low  
364 amounts of 2-DG were used, and the cells were treated only once after the start of  
365 the RV infection. This could explain the relatively small difference in viral load (Figure  
366 4C) in contrast to the significant difference in released extracellular viral RNA (Figure  
367 4B).

368

369 In our subsequent analysis, we found that 2-DG exerted a protective effect by  
370 significantly reducing virus-induced cell death in HeLa Ohio cells (Figure 4D). In  
371 contrast, RV infection does not cause cell lysis in cultures of healthy bronchial  
372 epithelial cells [39]. Interestingly, the same study reported increased viral replication  
373 and cell lysis after RV infection in asthmatic bronchial epithelial cells [39]. Based on

374 these findings, we could envision protection of RV-infected bronchial epithelial cells  
375 from asthma patients by 2-DG.

376

377 The host metabolic dependency of CoVs is similar to that of RVs and studies suggest  
378 that 2-DG alters SARS-CoV-2 replication [24], [26], [40]. This prompted us to further  
379 investigate the effect of 2-DG on CoV viral load. In our study, 2-DG treatment of  
380 endemic and pandemic CoVs resulted in a dose-dependent reduction of viral load.  
381 Compared to our data from RV viral load, lower concentrations of 2-DG are sufficient  
382 to cause a long-term significant reduction in viral load in both endemic and pandemic  
383 CoVs. This difference between RV and CoV can be attributed to differences in cell  
384 culture models. Another possible explanation is that CoVs are enveloped [13] and  
385 contain glycosylated envelope proteins responsible for host cell interaction and  
386 infection. Along with CoVs dependence on host glucose metabolism for replication  
387 [24], they are dependent on the host cell machinery for glycosylation of viral proteins  
388 [41]. Thus, the reduction in CoV viral load could originate from 2-DG not only  
389 inhibiting glycolysis but also affecting protein and lipid glycosylation [42]. However,  
390 further studies are required to decipher a possible role of 2-DG in the production of  
391 defective virions in enveloped viruses.

392

393 In conclusion, we present a host-directed approach to tackle RV and CoV infections.  
394 The dependency of these viruses on the host cell metabolism and cell machinery  
395 reveals a therapeutic opportunity to target them with glucose analogues, such as 2-  
396 DG.

397

398 **ACKNOWLEDGMENTS**

399

400 We thank Melanie Graf and the Global Pathogen Safety Team (Takeda), most  
401 notably Jasmin de Silva, Elisabeth List and Effie Oindo (experiments), Veronika  
402 Sulzer (cell culture), Eva Ha, Simone Knotzer and Alexandra Schlapschy-Danzinger  
403 (virus propagation). SARS-CoV-2 was sourced via EVAg (supported by the European  
404 Community) and kindly provided by Christian Drosten and Victor Corman (Charité  
405 Universitätsmedizin, Institute of Virology, Berlin, Germany). HCoV-NL63 was kindly  
406 provided by Lia van der Hoek (Medical Microbiology, Academisch Medisch Centrum,  
407 Amsterdam, Netherlands).

408

409 **FUNDING**

410

411 This study was supported by a FFG Basisprogramm, grant number 36734898 (to  
412 G.ST Antivirals).

413

414 **CONFLICT OF INTERESTS**

415

416 L.W., S.C., V.K., A.A., X.C., D.S., A.-D.G., J.S. and G.G. are/were employees and/or  
417 shareholders of G.ST Antivirals, Vienna, Austria. G.G. and J.S. are co-inventors of  
418 patent application related to parts of the manuscript. M.K. and T.R.K. are employees  
419 and stockholders of Takeda Manufacturing Austria AG, Vienna, Austria.

420

421 **AUTHOR CONTRIBUTION**

422

423 L.W., M.K., S.C., V.K., A.A., X.C., D.S. and A.-D.G. performed experiments and  
424 analyzed data. D.B. and I.G. provided virus strains, reagents, and valuable input. A.-  
425 D.G., J.S., T.R.K., M.K. and G.G. were in charge of planning and directing the study.  
426 L.W and A.-D.G. wrote the manuscript with input from co-authors. All authors read  
427 and approved the final manuscript.

428

429 **FIGURE LEGENDS**

430

431 **Figure 1: Inhibition of RV replication by 2-DG in HeLa Ohio cells and HNECs.**

432 Intracellular viral RNA was measured 7 h post-infection at 0.005 TCID<sub>50</sub>/cell for the  
433 indicated RV strains in HeLa Ohio cells (A) and in undifferentiated HNECs (infected  
434 with 4.5x10<sup>4</sup> TCID<sub>50</sub>/well) (B). Cells were treated with the indicated concentrations of  
435 2-DG (represented on a log<sub>10</sub> scale) 1 h post-infection until the samples were  
436 collected. Graphs show pooled results ± SEM of 3-4 independent experiments.  
437 HNEC: human nasal epithelial cells, RV: rhinovirus.

438

439 **Figure 2: Inhibition of RV replication by 2-DG is dependent on the glucose**

440 **level.** Intracellular viral RNA was measured 7 h post-infection at 0.005 TCID<sub>50</sub>/cell for  
441 the indicated RV strains in HeLa Ohio cells in medium containing 1g/L glucose (A).  
442 Cells were treated with the indicated concentrations of 2-DG (represented on a log<sub>10</sub>  
443 scale) 1 h post-infection until samples were collected. Comparison of IC<sub>50</sub> of 2-DG on  
444 the indicated RV strains under physiological versus conventional culture conditions  
445 (B). Graphs show pooled result ± SEM of 3-4 independent experiments. RV:  
446 rhinovirus.

447

448 **Figure 3: Intracellular storage of 2-DG6P after short-term exposure to 2-DG.**

449 Luminescence measurements of intracellular 2-DG6P at the indicated times after  
450 HeLa Ohio cells (A) or undifferentiated human nasal epithelial cells (B) were exposed  
451 to 2-DG for 10 min. In (A) and (B), the left graphs show the 2-DG6P levels (in RLU) at  
452 time 0 min (i.e., immediately after 10 min 2-DG treatment), and the right graphs show  
453 percentage decay of 2-DG6P over time in HeLa Ohio and HNECs, respectively. Data  
454 show pooled result ± SEM of 2-3 independent experiments. RLU: relative  
455 luminescence units, HNEC: human nasal epithelial cells.

456

457 **Figure 4: 2-DG disrupts RNA template strand synthesis and inhibits RV-**  
458 **mediated cell death.** HeLa Ohio cells were infected with RV-B14 (0.5 TCID<sub>50</sub>/cell)

459 and treated with 10 mM 2-DG for 24 h to measure intracellular positive and negative  
460 viral RNA strand (A) or released extracellular viral RNA (B). Cells infected with RV-  
461 B14 (0.005 TCID<sub>50</sub>/cell) were treated with 3.57 mM 2-DG (IC<sub>90</sub> for RV-B14) for up to



462 48 h at 34°C to measure viral load (C). Cells infected with RV-B14 (0.5 TCID<sub>50</sub>/cell)  
463 and treated with the indicated concentrations of 2-DG for 24 h or 48 h at 37 °C for  
464 measurement of virus-induced cytopathic effect (D). Graphs show pooled results ±  
465 SEM of 2-4 independent experiments (A,B,D) or one experiment (C). ns: non-  
466 significant;  $p < 0.05$  (\* $p \leq 0.05$ , \*\* $p \leq 0.01$ , \*\*\* $p \leq 0.001$ , \*\*\*\* $p \leq 0.0001$ ). RV:  
467 rhinovirus.

468

469 **Figure 5: 2-DG shows a dose-dependent antiviral effect on different human**  
470 **coronaviruses.** Viral load was measured from cell culture supernatants 24 h to 48 h  
471 post-infection. 2-DG treatment with the indicated concentrations was started 1 h post-  
472 infection. Viral load of SARS-CoV-2 (BetaCoV/Germany/BavPat1/2020) (MOI 0.001)  
473 released from LLC-MK2 cells (A), HCoV-229E (MOI 0.01) released from MRC5 cells  
474 (B) and HCoV-NL-63 (MOI 0.01) released from LLC-MK2 cells (C). Graphs show  
475 pooled results ± SEM of 3 independent experiments. ns: non-significant;  $p < 0.05$  (\* $p$   
476  $\leq 0.05$ , \*\* $p \leq 0.01$ , \*\*\* $p \leq 0.001$ , \*\*\*\* $p \leq 0.0001$ ). SARS-CoV-2: severe acute  
477 respiratory syndrome coronavirus 2, HCoV: human corona virus.

478

#### 479 **SUPPLEMENTARY MATERIALS**

480

481 Supplement Table 1: Materials used in the study.

482 Supplement Table 2: IC<sub>50</sub> values of tested RV strains in Hela Ohio and HNECs.

483

484 **REFERENCES**

- 485 [1] H. A. Rotbart and F. G. Hayden, "Picornavirus infections: a primer for the  
486 practitioner," *Archives of Family Medicine*, vol. 9, pp. 913–920, Mar. 2000, doi:  
487 10.1001/archfami.9.9.913.
- 488 [2] T. K. Cabeça, C. Granato, and N. Bellei, "Epidemiological and clinical features  
489 of human coronavirus infections among different subsets of patients," *Influenza  
490 and Other Respiratory Viruses*, vol. 7, pp. 1040–1047, Mar. 2013, doi:  
491 10.1111/irv.12101.
- 492 [3] K. K. W. To *et al.*, "Pulmonary and extrapulmonary complications of human  
493 rhinovirus infection in critically ill patients," *Journal of Clinical Virology: The  
494 Official Publication of the Pan American Society for Clinical Virology*, vol. 77,  
495 pp. 85–91, Mar. 2016, doi: 10.1016/j.jcv.2016.02.014.
- 496 [4] S. Lee, S. S. Chiu, P. J. S. Malik, K. Chan, H. W. Wong, and Y. Lau, "Is  
497 respiratory viral infection really an important trigger of asthma exacerbations in  
498 children?," *European Journal of Pediatrics*, vol. 170, pp. 1317–1324, Mar.  
499 2011, doi: 10.1007/s00431-011-1446-1.
- 500 [5] I. Hung *et al.*, "Unexpectedly Higher Morbidity and Mortality of Hospitalized  
501 Elderly Patients Associated with Rhinovirus Compared with Influenza Virus  
502 Respiratory Tract Infection," *International Journal of Molecular Sciences*, vol.  
503 18, p. 259, Mar. 2017, doi: 10.3390/ijms18020259.
- 504 [6] D. Santesmasses *et al.*, "COVID-19 is an emergent disease of aging," *Aging  
505 Cell*, vol. 19, Mar. 2020, doi: 10.1111/accel.13230.
- 506 [7] D. M. Cutler and L. H. Summers, "The COVID-19 Pandemic and the 16 Trillion  
507 Virus," *JAMA*, vol. 324, Mar. 2020, doi: 10.1001/jama.2020.19759.
- 508 [8] A. M. Fendrick, A. S. Monto, B. Nightengale, and M. Sarnes, "The Economic  
509 Burden of Non-Influenza-Related Viral Respiratory Tract Infection in the United  
510 States," *Archives of Internal Medicine*, vol. 163, p. 487, Mar. 2003, doi:  
511 10.1001/archinte.163.4.487.
- 512 [9] A. C. Palmenberg *et al.*, "Sequencing and Analyses of All Known Human  
513 Rhinovirus Genomes Reveal Structure and Evolution," *Science (1979)*, vol.  
514 324, pp. 55–59, Mar. 2009, doi: 10.1126/science.1165557.
- 515 [10] F. Hofer *et al.*, "Members of the low density lipoprotein receptor family mediate  
516 cell entry of a minor-group common cold virus.," *Proceedings of the National  
517 Academy of Sciences*, vol. 91, pp. 1839–1842, Mar. 1994, doi:  
518 10.1073/pnas.91.5.1839.
- 519 [11] B. A. Schuler *et al.*, "Major and minor group rhinoviruses elicit differential  
520 signaling and cytokine responses as a function of receptor-mediated signal  
521 transduction," *PloS One*, vol. 9, p. e93897, 2014, doi:  
522 10.1371/journal.pone.0093897.
- 523 [12] D. Blaas and R. Fuchs, "Mechanism of human rhinovirus infections," *Molecular  
524 and Cellular Pediatrics*, vol. 3, Mar. 2016, doi: 10.1186/s40348-016-0049-3.
- 525 [13] P. C. Y. Woo, Y. Huang, S. K. P. Lau, and K.-Y. Yuen, "Coronavirus Genomics  
526 and Bioinformatics Analysis," *Viruses*, vol. 2, pp. 1804–1820, Mar. 2010, doi:  
527 10.3390/v2081803.
- 528 [14] L. van der Hoek *et al.*, "Identification of a new human coronavirus," *Nature  
529 Medicine*, vol. 10, pp. 368–373, Mar. 2004, doi: 10.1038/nm1024.
- 530 [15] K. McIntosh, J. H. Dees, W. B. Becker, A. Z. Kapikian, and R. M. Chanock,  
531 "Recovery in tracheal organ cultures of novel viruses from patients with  
532 respiratory disease.," *Proc Natl Acad Sci U S A*, vol. 57, pp. 933–940, Mar.

- 533 1967, [Online]. Available:  
534 <https://www.ncbi.nlm.nih.gov/pmc/articles/PMC224637/>
- 535 [16] D. Hamre and J. J. Procknow, "A New Virus Isolated from the Human  
536 Respiratory Tract.," *Experimental Biology and Medicine*, vol. 121, pp. 190–193,  
537 Mar. 1966, doi: 10.3181/00379727-121-30734.
- 538 [17] L. Vijgen *et al.*, "Circulation of genetically distinct contemporary human  
539 coronavirus OC43 strains," *Virology*, vol. 337, pp. 85–92, Mar. 2005, doi:  
540 10.1016/j.virol.2005.04.010.
- 541 [18] J. O. Hendley, H. B. Fishburne, and J. M. Gwaltney, "Coronavirus infections in  
542 working adults. Eight-year study with 229 E and OC 43," *The American Review*  
543 *of Respiratory Disease*, vol. 105, pp. 805–811, Mar. 1972, doi:  
544 10.1164/arrd.1972.105.5.805.
- 545 [19] A. F. Bradburne, M. L. Bynoe, and D. A. Tyrrell, "Effects of a 'new' human  
546 respiratory virus in volunteers.," *British Medical Journal*, vol. 3, pp. 767–769,  
547 Mar. 1967, [Online]. Available:  
548 <https://www.ncbi.nlm.nih.gov/pmc/articles/PMC1843247/>
- 549 [20] N. Kaur, R. Singh, Z. Dar, R. K. Bijarnia, N. Dhingra, and T. Kaur, "Genetic  
550 comparison among various coronavirus strains for the identification of potential  
551 vaccine targets of SARS-CoV2," *Infection, Genetics and Evolution*, p. 104490,  
552 Mar. 2020, doi: 10.1016/j.meegid.2020.104490.
- 553 [21] E. L. Sanchez and M. Lagunoff, "Viral activation of cellular metabolism,"  
554 *Virology*, vol. 479–480, pp. 609–618, Mar. 2015, doi:  
555 10.1016/j.virol.2015.02.038.
- 556 [22] K. A. Mayer, J. Stöckl, G. J. Zlabinger, and G. A. Gualdoni, "Hijacking the  
557 Supplies: Metabolism as a Novel Facet of Virus-Host Interaction," *Frontiers in*  
558 *Immunology*, vol. 10, Mar. 2019, doi: 10.3389/fimmu.2019.01533.
- 559 [23] S. K. Thaker, J. Ch'ng, and H. R. Christofk, "Viral hijacking of cellular  
560 metabolism," *BMC Biology*, vol. 17, Mar. 2019, doi: 10.1186/s12915-019-0678-  
561 9.
- 562 [24] A. C. Codo *et al.*, "Elevated Glucose Levels Favor SARS-CoV-2 Infection and  
563 Monocyte Response through a HIF-1 $\alpha$ /Glycolysis-Dependent Axis," *Cell*  
564 *Metabolism*, vol. 32, pp. 437–446.e5, Mar. 2020, doi:  
565 10.1016/j.cmet.2020.07.007.
- 566 [25] G. A. Gualdoni *et al.*, "Rhinovirus induces an anabolic reprogramming in host  
567 cell metabolism essential for viral replication," *Proceedings of the National*  
568 *Academy of Sciences*, vol. 115, pp. E7158–E7165, Mar. 2018, doi:  
569 10.1073/pnas.1800525115.
- 570 [26] P. Bissonnette, H. Gagne, A. Blais, and A. Berteloot, "2-Deoxyglucose  
571 transport and metabolism in Caco-2 cells," *American Journal of Physiology-*  
572 *Gastrointestinal and Liver Physiology*, vol. 270, pp. G153–G162, Mar. 1996,  
573 doi: 10.1152/ajpgi.1996.270.1.g153.
- 574 [27] A. Waki *et al.*, "The importance of glucose transport activity as the rate-limiting  
575 step of 2-deoxyglucose uptake in tumor cells in vitro," *Nuclear Medicine and*  
576 *Biology*, vol. 25, pp. 593–597, Mar. 1998, doi: 10.1016/s0969-8051(98)00038-  
577 9.
- 578 [28] F. Bost, A.-G. Decoux-Pouillot, J. F. Tanti, and S. Clavel, "Energy disruptors:  
579 rising stars in anticancer therapy?," *Oncogenesis*, vol. 5, p. e188, Mar. 2016,  
580 doi: 10.1038/oncsis.2015.46.

- 581 [29] H. T. Kang and E. S. Hwang, "2-Deoxyglucose: An anticancer and antiviral  
582 therapeutic, but not any more a low glucose mimetic," *Life Sciences*, vol. 78,  
583 pp. 1392–1399, Mar. 2006, doi: 10.1016/j.lfs.2005.07.001.
- 584 [30] K. D. Passalacqua *et al.*, "Glycolysis Is an Intrinsic Factor for Optimal  
585 Replication of a Norovirus," *mBio*, vol. 10, Mar. 2019, doi: 10.1128/mbio.02175-  
586 18.
- 587 [31] K. A. Fontaine, E. L. Sanchez, R. Camarda, and M. Lagunoff, "Dengue Virus  
588 Induces and Requires Glycolysis for Optimal Replication," *Journal of Virology*,  
589 vol. 89, pp. 2358–2366, Mar. 2014, doi: 10.1128/jvi.02309-14.
- 590 [32] S. Wiehler and D. Proud, "Specific Assay of Negative Strand Template to  
591 Quantify Intracellular Levels of Rhinovirus Double-Stranded RNA," *Methods  
592 and Protocols*, vol. 4, p. 13, Mar. 2021, doi: 10.3390/mps4010013.
- 593 [33] K. J. Livak and T. D. Schmittgen, "Analysis of Relative Gene Expression Data  
594 Using Real-Time Quantitative PCR and the 2- $\Delta\Delta$ CT Method," *Methods*, vol.  
595 25, no. 4, pp. 402–408, Dec. 2001, doi: 10.1006/meth.2001.1262.
- 596 [34] L. J. REED and H. MUENCH, "A SIMPLE METHOD OF ESTIMATING FIFTY  
597 PER CENT ENDPOINTS<sup>12</sup>," *American Journal of Epidemiology*, vol. 27, no. 3,  
598 pp. 493–497, May 1938, doi: 10.1093/oxfordjournals.aje.a118408.
- 599 [35] L. Deszcz, E. Gaudernak, E. Kuechler, and J. Seipelt, "Apoptotic events  
600 induced by human rhinovirus infection," *Journal of General Virology*, vol. 86,  
601 pp. 1379–1389, Mar. 2005, doi: 10.1099/vir.0.80754-0.
- 602 [36] J. P. Garnett, E. H. Baker, and D. L. Baines, "Sweet talk: insights into the  
603 nature and importance of glucose transport in lung epithelium," *European  
604 Respiratory Journal*, vol. 40, pp. 1269–1276, Mar. 2012, doi:  
605 10.1183/09031936.00052612.
- 606 [37] S. Nirwan and R. Kakkar, "Rhinovirus RNA Polymerase," *Viral Polymerases*,  
607 pp. 301–331, 2019, doi: 10.1016/B978-0-12-815422-9.00011-5.
- 608 [38] L. van der Linden, K. C. Wolthers, and F. J. M. van Kuppeveld, "Replication  
609 and Inhibitors of Enteroviruses and Parechoviruses," *Viruses*, vol. 7, pp. 4529–  
610 4562, Mar. 2015, doi: 10.3390/v7082832.
- 611 [39] P. A. B. Wark *et al.*, "Asthmatic bronchial epithelial cells have a deficient innate  
612 immune response to infection with rhinovirus," *The Journal of Experimental  
613 Medicine*, vol. 201, pp. 937–947, Mar. 2005, doi: 10.1084/jem.20041901.
- 614 [40] D. Bojkova *et al.*, "Proteomics of SARS-CoV-2-infected host cells reveals  
615 therapy targets," *Nature*, Mar. 2020, doi: 10.1038/s41586-020-2332-7.
- 616 [41] Y. Watanabe, T. A. Bowden, I. A. Wilson, and M. Crispin, "Exploitation of  
617 glycosylation in enveloped virus pathobiology," *Biochimica et Biophysica Acta  
618 (BBA) - General Subjects*, vol. 1863, pp. 1480–1497, Mar. 2019, doi:  
619 10.1016/j.bbagen.2019.05.012.
- 620 [42] A. N. Bhatt *et al.*, "Glycolytic inhibitor 2-deoxy-d-glucose attenuates SARS-  
621 CoV-2 multiplication in host cells and weakens the infective potential of  
622 progeny virions," *Life Sciences*, vol. 295, p. 120411, Mar. 2022, doi:  
623 10.1016/j.lfs.2022.120411.
- 624

Figure 1

A

HeLa Ohio cells, 2 g/L glucose

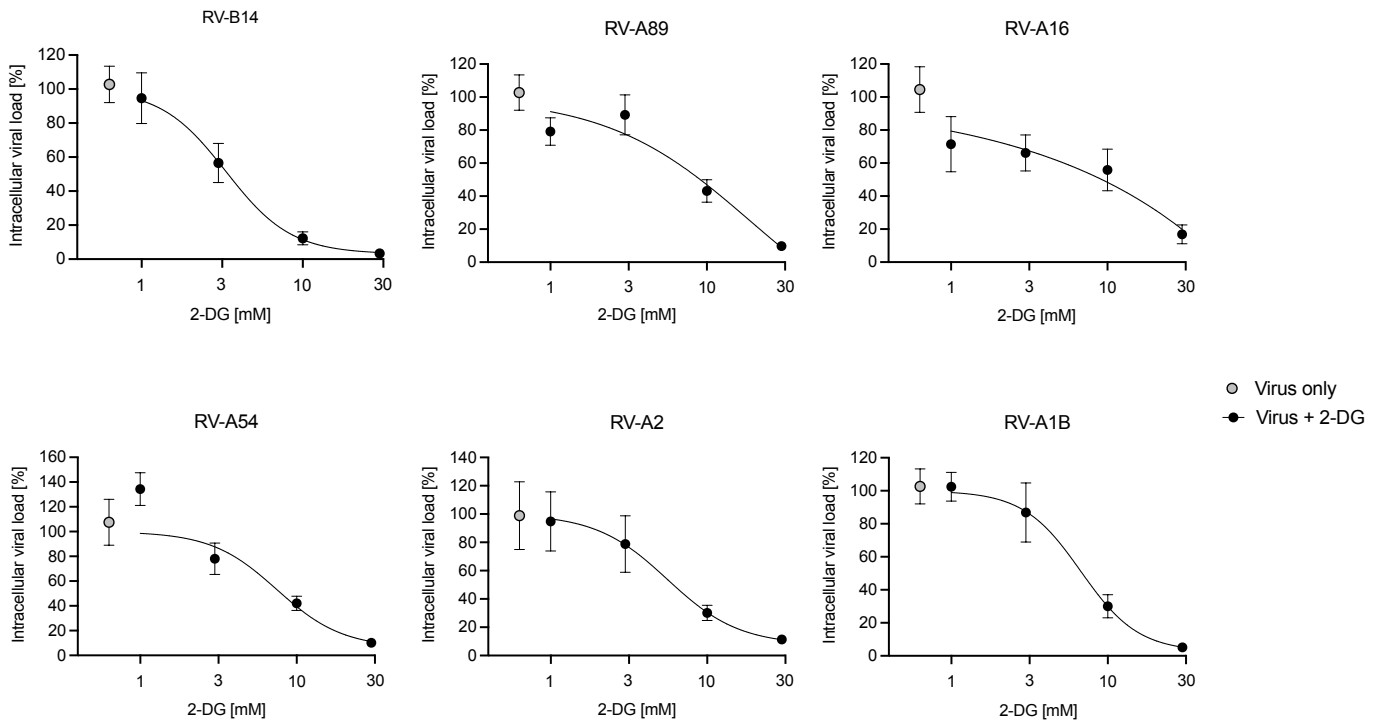

B

Undifferentiated HNECs, >1 g/L glucose

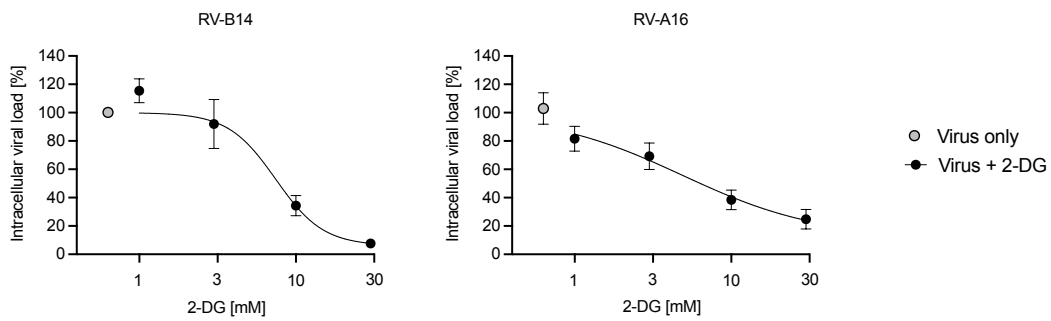

Figure 2

A

HeLa Ohio cells, 1 g/L glucose

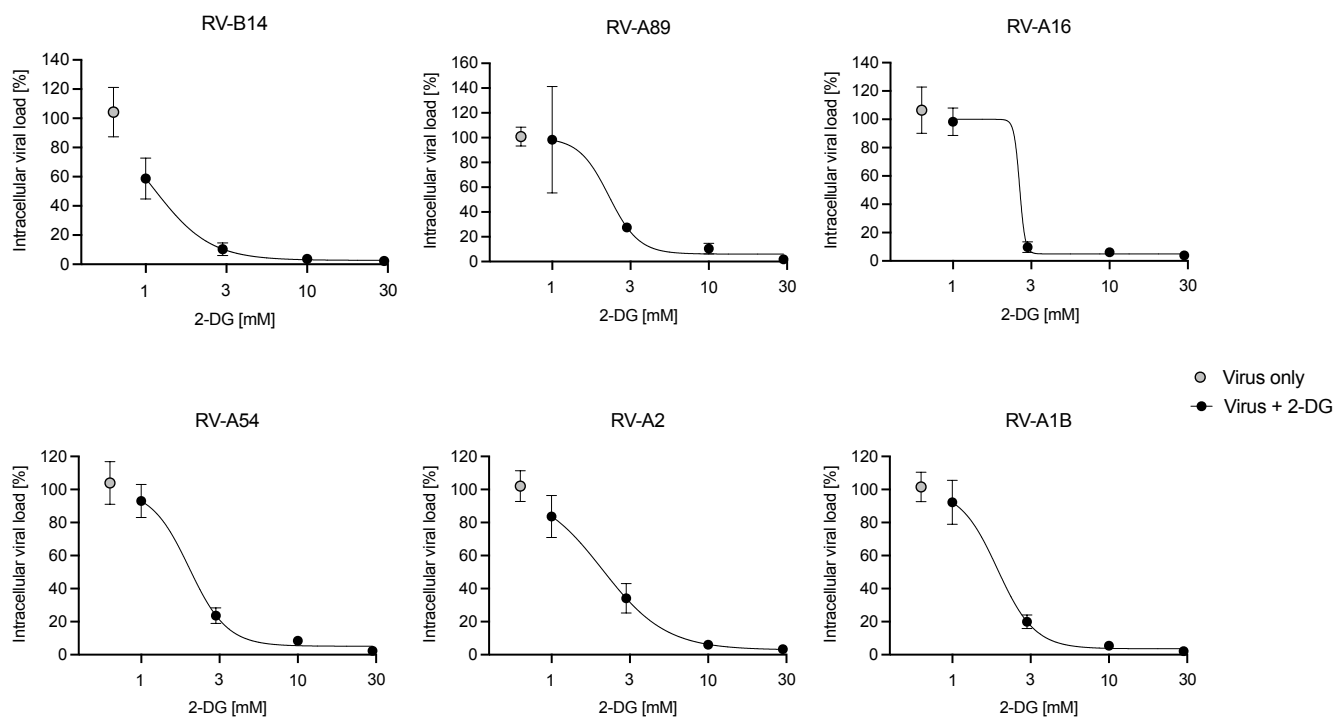

B

IC<sub>50</sub> comparison, 2 g/L glucose vs 1 g/L glucose

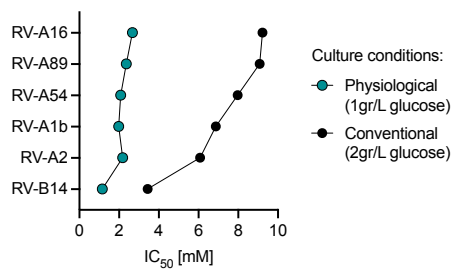

Figure 3

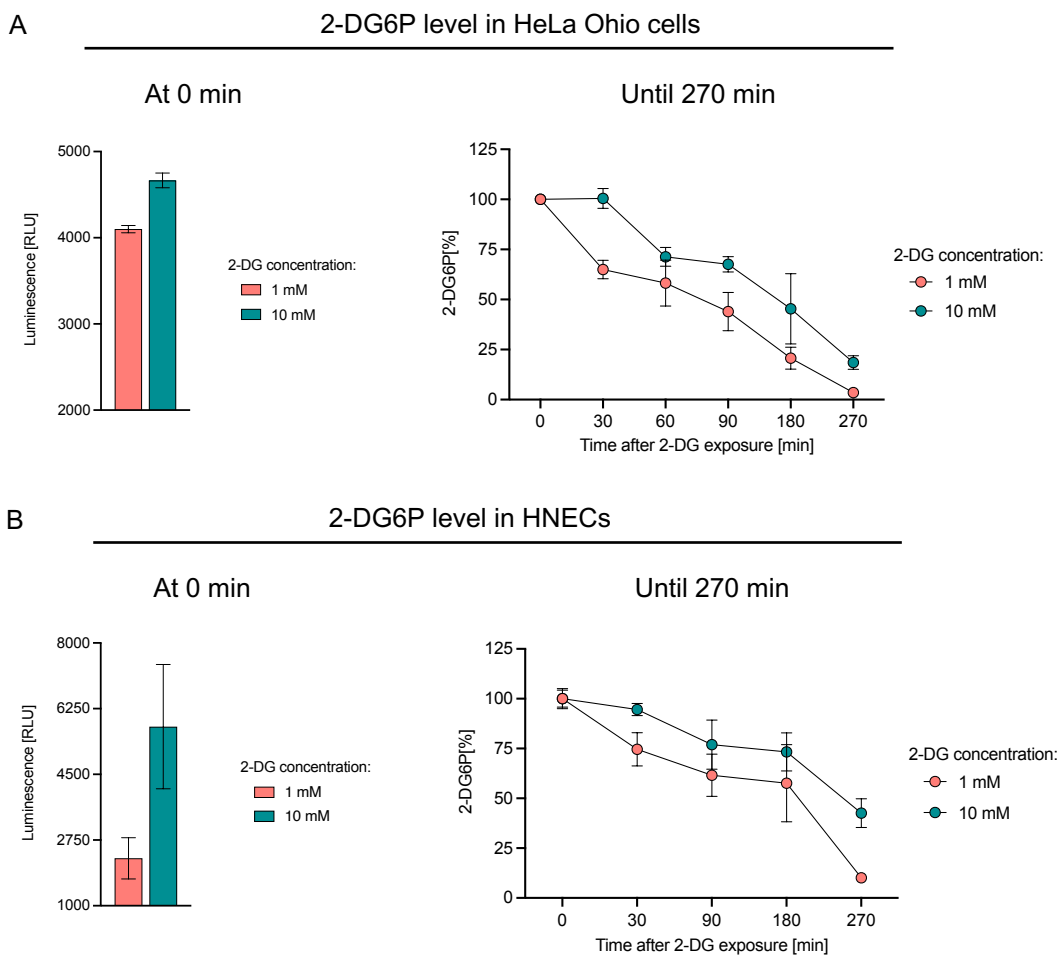

Figure 4

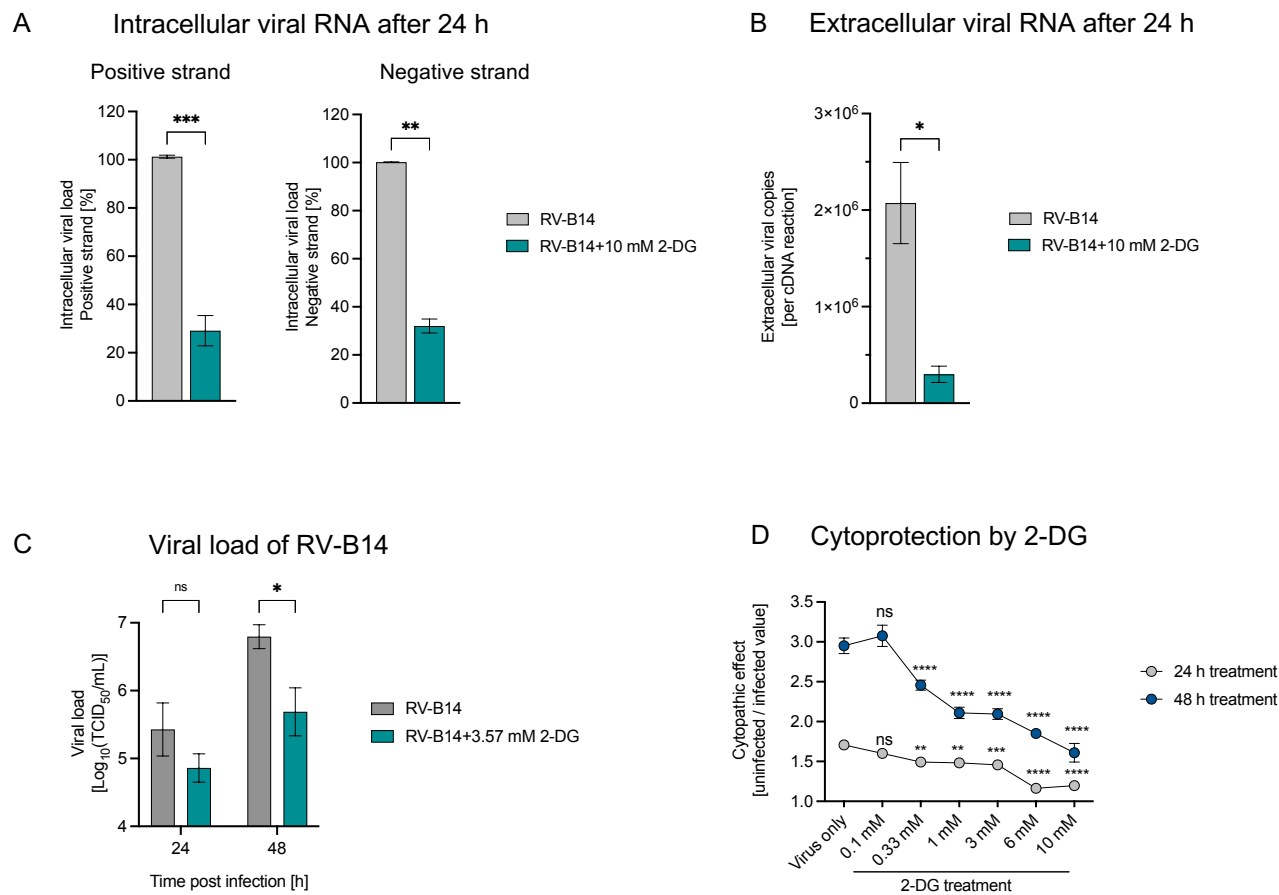



Figure 5

**A** Viral load of SARS-CoV-2

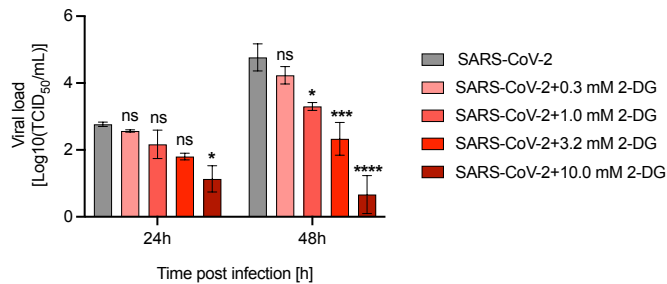

**B** Viral load of HCoV-229E

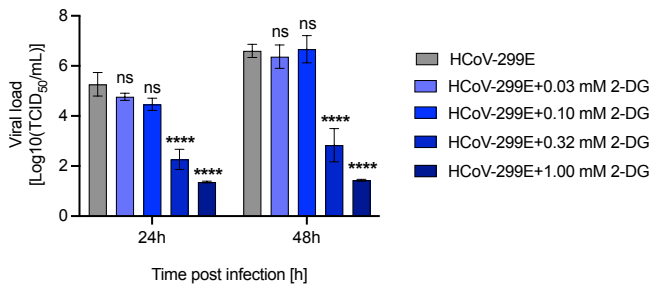

**C** Viral load of HCoV-NL63

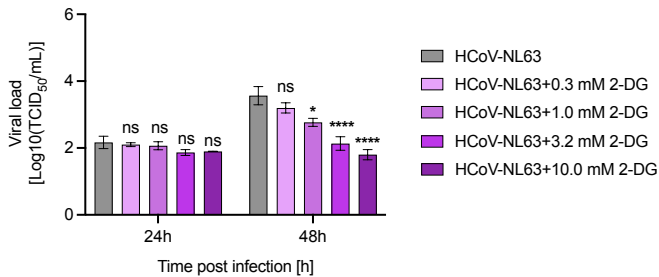

Source: https://www.biorxiv.org/content/10.1101/2022.05.24.493068v1.full.pdf
